1 ***N*<sup>6</sup>-methyladenosine modification of HIV-1 RNA evades RIG-I-mediated sensing to**  
2 **suppresses type-I interferon induction in monocytic cells**

3

4 **Short title:** m<sup>6</sup>A modification of HIV-1 RNA evades cellular sensing

5

6 Shuliang Chen<sup>1,#,¶</sup>, Sameer Kumar<sup>2,¶</sup>, Nagaraja Tirumuru<sup>1</sup>, Jennifer L. Welch<sup>3</sup>, Lulu Hu<sup>4</sup>, Chuan  
7 He<sup>4,5</sup>, Jack T. Stapleton<sup>2,3</sup>, and Li Wu<sup>2,\*</sup>

8

9 <sup>1</sup> Center for Retrovirus Research, Department of Veterinary Biosciences, The Ohio State  
10 University, Columbus, Ohio, United States of America

11 <sup>2</sup> Department of Microbiology and Immunology, Carver College of Medicine, University of  
12 Iowa, Iowa City, Iowa, United States of America

13 <sup>3</sup> Division of Infectious Diseases, Department of Internal Medicine, Carver College of Medicine,  
14 University of Iowa, The Iowa City VA Healthcare System, Iowa City, Iowa, United States of  
15 America

16 <sup>4</sup> Department of Chemistry, Department of Biochemistry and Molecular Biology, Institute for  
17 Biophysical Dynamics, University of Chicago, Chicago, Illinois, United States of America

18 <sup>5</sup> Howard Hughes Medical Institute, University of Chicago, Chicago, Illinois, United States of  
19 America

20

21 # Present address: School of Basic Medical Sciences, Wuhan University, Wuhan, Hubei, China.

22 \* Corresponding author: E-mail: [li-wu@uiowa.edu](mailto:li-wu@uiowa.edu) (LW)

23 ¶ These authors contributed equally to this work.

24 **Abstract**

25 *N*<sup>6</sup>-methyladenosine (m<sup>6</sup>A) is a prevalent RNA modification that plays a key role in  
26 regulating eukaryotic cellular mRNA functions. RNA m<sup>6</sup>A modification is regulated by two  
27 groups of cellular proteins, writers and erasers that add or remove m<sup>6</sup>A, respectively. HIV-1  
28 RNA contains m<sup>6</sup>A modifications that modulate viral infection and gene expression in cells.  
29 However, it remains unclear whether m<sup>6</sup>A modifications of HIV-1 RNA modulate innate  
30 immune responses in cells or HIV-1-infected individuals. Here we show that m<sup>6</sup>A modification  
31 of HIV-1 RNA suppresses the expression of antiviral cytokine type-I interferon (IFN-I) in human  
32 monocytic cells. Transfection of differentiated monocytic cells with HIV-1 RNA fragments  
33 containing a single m<sup>6</sup>A-modification significantly reduced IFN-I mRNA expression relative to  
34 their unmodified RNA counterparts. We generated HIV-1 with altered RNA m<sup>6</sup>A levels by  
35 manipulating the expression of the m<sup>6</sup>A erasers or pharmacological inhibition of m<sup>6</sup>A addition in  
36 virus-producing cells. RNA transfection and viral infection of differentiated monocytic cells  
37 demonstrated that HIV-1 RNA with decreased m<sup>6</sup>A levels enhanced IFN-I expression, whereas  
38 HIV-1 RNA with increased m<sup>6</sup>A modifications had opposite effects. Our mechanistic studies  
39 revealed that m<sup>6</sup>A of HIV-1 RNA escaped the RIG-I-mediated RNA sensing and activation of  
40 the transcription factors IRF3 and IRF7 that drive IFN-I gene expression. Moreover, RNA of  
41 peripheral blood mononuclear cells from HIV-1 viremic patients showed increased m<sup>6</sup>A levels  
42 that correlated with increased *IFN-I* mRNA expression compared to levels from HIV-1-  
43 suppressed patients on antiretroviral therapy. Together, our results suggest that RNA m<sup>6</sup>A  
44 modifications regulate viral replication and antiviral innate immune responses in HIV-1-infected  
45 individuals.

## 46 **Author Summary**

47 HIV-1 is known as a weak inducer of antiviral cytokines including IFN-I, but it is unclear  
48 how HIV-1 evades innate immunity. Different types of RNA modifications including m<sup>6</sup>A  
49 within the HIV-1 genome modulate viral replication; however, the role of m<sup>6</sup>A modifications of  
50 HIV-1 RNA in regulating innate immune responses remains elusive. In this study, we found that  
51 HIV-1 RNA modified with m<sup>6</sup>A suppresses the expression of IFN-I in differentiated monocytic  
52 cells by avoiding innate immune detection of viral RNA mediated by RIG-I, an RNA sensor in  
53 host cells. We also observed significantly increased RNA m<sup>6</sup>A modifications of peripheral blood  
54 mononuclear cells from HIV-1 viremic patients compared to virally suppressed patients on  
55 combined antiretroviral therapy, suggesting a functional link between m<sup>6</sup>A modifications and  
56 antiretroviral treatment. Investigating the functions of m<sup>6</sup>A modifications of HIV-1 RNA in  
57 regulating innate immune sensing and IFN-I induction in monocytic cells can help understand  
58 the mechanisms of HIV-1 persistence.

59  
60 **Keywords:** HIV-1, m<sup>6</sup>A RNA modification, IFN-I, RIG-I, innate immune responses.

## 61 62 **Introduction**

63 Transcriptional modification of RNA in cells plays a crucial role in its stability,  
64 transportation, processing and thus regulation of gene expression. There are more than 160 RNA  
65 modifications identified in eukaryotes [1]. Methylation at the N<sup>6</sup> position of adenosine (m<sup>6</sup>A) is a  
66 post-transcriptional RNA modification in internal and untranslated regions (UTRs) of eukaryotic  
67 mRNAs, microRNAs, small nuclear RNAs and long noncoding RNAs, which is important for  
68 RNA localization, stability and protein translation [1-5]. This methylation is controlled by two

69 types of protein factors in cells, comprised of the writer complex [(methyltransferase-like 3  
70 (METTL3) and METTL14] to incorporate methylation, and the erasers [fat mass and obesity  
71 associated protein (FTO) and  $\alpha$ -ketoglutarate dependent dioxygenase AlkB homolog 5  
72 (ALKBH5)] to remove m<sup>6</sup>A modification [6-9]. RNA m<sup>6</sup>A modification has been discovered in  
73 several RNA and DNA viruses over the past 40 years, although its effects on the viral lifecycle  
74 remain not fully understood [10-15]. Recent advancement of RNA sequencing based strategies  
75 expanded the identification and characterization of m<sup>6</sup>A to several clinically significant human  
76 pathogens [16], including HIV-1 [17-19]. Increasing evidence suggests that m<sup>6</sup>A modification  
77 plays a major role in regulation of viral replication and gene expression [16] and the immune  
78 system [20].

79 In the early stage of virus infections, sensing viral nucleic acids in infected cells is a  
80 critical step to induce innate immune responses that can lead to production of antiviral cytokines,  
81 including IFN-I (mainly IFN- $\alpha$  and IFN- $\beta$ ) [21]. Genomic RNA of HIV-1 and other viruses can  
82 be detected by cytosolic sensors, including retinoic acid-induced gene I (RIG-I) and melanoma  
83 differentiation-associated gene 5 (MDA5) [21]. Detection of viral RNA by these sensors triggers  
84 activation of several cellular kinases, which phosphorylate interferon regulatory factors 3 and 7  
85 (IRF3 and IRF7) to induce IFN-I expression [22, 23]. HIV-1 is a weak inducer of host innate  
86 immune responses [24, 25], and it evades immune recognition by direct targeting of immune  
87 pathways, interacting with cellular proteins, or masking the viral genome from the cytosolic  
88 sensors [24, 26, 27]. HIV-1 RNA can be sensed by both RIG-I and MDA5, whereas it has  
89 evolved multiple strategies to escape innate immune surveillance [23, 28]. A recent study  
90 showed that 2'-O-methylation in HIV-1 RNA prevents MDA5-mediated sensing in myeloid

91 cells, and thereby reduces IFN-I induction [29]. However, the role of m<sup>6</sup>A in regulating innate  
92 immune responses to HIV-1 RNA and the underlying mechanisms have not been defined.

93 Our previous *in vitro* studies showed that HIV-1 infection or HIV-1 envelope protein  
94 treatment of CD4<sup>+</sup> T cells significantly up-regulates m<sup>6</sup>A levels of cellular RNA independently  
95 of viral replication [30]. However, it remains unclear whether m<sup>6</sup>A levels and IFN-I expression  
96 in HIV-1-infected individuals can be altered by effective antiretroviral therapy (ART), which  
97 leads to undetectable viral load in the vast majority of treated HIV-1 patients [31]. To address  
98 these fundamental questions and to better understand the role of m<sup>6</sup>A in HIV-1 infection *in vivo*,  
99 we measured the levels of m<sup>6</sup>A and IFN-I expression in peripheral blood mononuclear cells  
100 (PBMCs) of healthy donors, HIV-1 viremic patients before ART, and HIV-1 patients on ART.

101 Here we show that m<sup>6</sup>A modifications of HIV-1 RNA reduce viral RNA sensing and the  
102 induction of IFN-I in differentiated monocytic cells. We found that m<sup>6</sup>A-defective HIV-1 RNA  
103 induced IFN-I expression through RIG-I-mediated pathway, suggesting that m<sup>6</sup>A is an immune  
104 evasion strategy of HIV-1. In contrast to *in vitro* results, we also observed significantly increased  
105 levels of m<sup>6</sup>A RNA modifications and IFN-I expression in PBMCs from HIV-1 viremic patients  
106 compared to patients on ART. These results implicate that RNA m<sup>6</sup>A modifications can  
107 contribute to regulation of viral replication, innate immune responses, and ART in HIV-1-  
108 infected individuals.

109

## 110 **Results**

### 111 **A single m<sup>6</sup>A modification of HIV-1 RNA oligos inhibits IFN-I induction in U937 cells.**

112 To examine the effect of m<sup>6</sup>A modification of HIV-1 RNA on IFN-I induction, we designed two  
113 different RNA oligos corresponding to two fragments of HIV-1 genome each with or without a

114 single m<sup>6</sup>A modification [32] for transfection experiments. We have reported that these two m<sup>6</sup>A  
115 modifications in the 5' untranslated regions (UTR) of HIV-1 genome are important for HIV-1  
116 RNA binding to the m<sup>6</sup>A reader proteins (YTH domain family proteins 1-3) *in vitro* and viral  
117 replication in cells [32]. The m<sup>6</sup>A-modified RNA oligos 1 and 2 (both 42 mer) contained a single  
118 m<sup>6</sup>A-modified adenosine in the conserved GGACU motif of the HIV-1 (NL4-3 strain) genome  
119 [32]. The m<sup>6</sup>A modification of the oligos was confirmed by immunoblotting with equal amounts  
120 of RNAs using m<sup>6</sup>A-specific antibodies (Fig. 1A and 1D). To mimic cellular responses to viral  
121 RNA in non-dividing macrophages, we differentiated monocytic U937 cells with phorbol 12-  
122 myristate 13-acetate (PMA) before transfection with the RNA oligos. Compared to unmethylated  
123 control (Ctrl) RNA, m<sup>6</sup>A-modified RNA oligo 1 induced 3- to 4-fold lower ( $P < 0.005$ ) levels of  
124 *IFN- $\alpha$*  and *IFN- $\beta$*  mRNA in transfected cells (Fig. 1B and 1C). Similar results were obtained with  
125 transfection of oligo 2, although the effects were less significant compared to oligo 1 (Fig. 1E  
126 and 1F). These results indicate that m<sup>6</sup>A modification of the 5' UTR of HIV-1 RNA fragments  
127 inhibits IFN-I induction in differentiated U937 cells.

128

### 129 **Inhibition of m<sup>6</sup>A modifications of HIV-1 RNA by FTO increases IFN-I induction.**

130 The m<sup>6</sup>A erasers (FTO and ALKBH5) orchestrate cellular mRNA functions by removing m<sup>6</sup>A  
131 modifications on mRNA [2]. To investigate whether m<sup>6</sup>A modifications of HIV-1 genomic RNA  
132 could suppress IFN-I induction in cells, purified RNA from HIV-1 virions was demethylated  
133 with recombinant FTO *in vitro*, resulting in a 10-fold decrease in m<sup>6</sup>A level relative to control  
134 HIV-1 RNAs (Fig. 2A). Transfection of m<sup>6</sup>A-reduced HIV-1 RNA into U937 cells induced 3-  
135 fold higher *IFN- $\alpha$*  and *IFN- $\beta$*  expression ( $P < 0.0005$ ) compared to control RNAs (Fig. 2B and

136 2C), suggesting that m<sup>6</sup>A modification of HIV-1 genomic RNA suppresses IFN-I induction in  
137 myeloid cells.

138 To determine the effect of m<sup>6</sup>A of HIV-1 RNA on IFN-I induction during viral infection,  
139 HIV-1 containing lower levels of m<sup>6</sup>A in viral RNA was generated by overexpression of the  
140 eraser FTO in HIV-1-producing HEK293T cells. Compared to the vector control, FTO  
141 overexpression in HEK293T cells had no significant effect on the expression of HIV-1 Gag and  
142 capsid (CA, or p24) proteins (Fig. 2D). HIV-1 derived from FTO-overexpressed HEK293T cells  
143 (m<sup>6</sup>A-lower HIV-1) showed 10-fold lower m<sup>6</sup>A levels of viral RNA compared to viruses derived  
144 from control cells (Fig. 2E). When PMA-differentiated U937 cells were transfected with RNA of  
145 m<sup>6</sup>A-lower HIV-1, a 2-fold increase ( $P < 0.05$ ) of *IFN-α* and *IFN-β* expression was observed  
146 compared to control HIV-1 RNA (Fig. 2F and 2G). As a positive control, poly(I:C) induced  
147 approximately 190-fold increases of *IFN-α* and *IFN-β* expression in transfected U937 cells (Fig.  
148 2F and 2G). Moreover, differentiated U937 cells infected with m<sup>6</sup>A-lower HIV-1 expressed 2-  
149 fold higher ( $P < 0.05$ ) *IFN-α* and *IFN-β* relative to control HIV-1 (Fig. 2H and 2I). Thus, HIV-1  
150 containing reduced RNA m<sup>6</sup>A modifications induces higher *IFN-I* expression in differentiated  
151 U937 cells.

152

### 153 **Inhibition of m<sup>6</sup>A modifications of HIV-1 RNA by ALKBH5 increases IFN-I induction.**

154 To confirm the results of FTO treatment and overexpression, we also examined the effect of  
155 another m<sup>6</sup>A eraser ALKBH5 on HIV-1 RNA-mediated IFN-I induction in PMA-differentiated  
156 U937 cells. ALKBH5 overexpression in HIV-1-producing HEK293T cells had no significant  
157 effect on the expression of HIV-1 Gag and CA (Fig. 3A). The m<sup>6</sup>A modification of HIV-1 RNA  
158 generated from ALKBH5-overexpressed HEK293T cells showed a 2-fold decrease compared to

159 HIV-1 RNA from control cells (Fig. 3B). *IFN- $\alpha$*  and *IFN- $\beta$*  levels in U937 cells transfected with  
160 HIV-1 RNA from ALKBH5-overexpressed HEK293T cells were 1.8-fold higher ( $P < 0.05$ )  
161 compared to that from control cells (Fig. 3C and 3D). Furthermore, infection of U937 cells with  
162 HIV-1 from ALKBH5-overexpressed HEK293T cells induced 2-fold higher *IFN- $\alpha$*  and *IFN- $\beta$*   
163 expression ( $P < 0.0005$ ) compared to HIV-1 from control HEK293T cells (Fig. 3E and 3F).  
164 Thus, inhibition of m<sup>6</sup>A modifications of HIV-1 RNA by eraser overexpression in virus-  
165 producing cells increases *IFN-I* induction in differentiated U937 cells.

166

167 **Knockout (KO) of erasers increases m<sup>6</sup>A levels in HIV-1 RNA and reduces IFN-I**  
168 **induction.**

169 To validate the results from eraser overexpression, we constructed FTO-KO and ALKBH5-KO  
170 HEK293T cell lines by the CRISPR-Cas9 method. Next, these cell lines were transfected to  
171 generate HIV-1 with increased m<sup>6</sup>A of viral RNA. Western blotting results showed that FTO and  
172 ALKBH5 were completely silenced and HIV-1 Gag protein expression was not significantly  
173 affected by FTO and ALKBH5 knockout (Fig. 4A). HIV-1 RNA from FTO-KO and ALKBH5-  
174 KO cells showed 7- and 25-fold higher m<sup>6</sup>A levels, respectively, relative to that from control  
175 (Con-KO) cells (Fig. 4B). Transfection of PMA-differentiated U937 cells with HIV-1 RNA  
176 derived from FTO-KO or ALKBH5-KO cells showed a 3-4-fold decrease ( $P < 0.05$ ) in *IFN-I*  
177 expression compared to that from Con-KO cells (Fig. 4C and 4D). Moreover, infection of PMA-  
178 differentiated U937 cells with HIV-1 from FTO-KO or ALKBH5-KO cells induced  
179 approximately 2-fold less *IFN-I* expression ( $P < 0.005$ ) compared to Con-KO cells (Fig. 4E and  
180 4F). Thus, increasing m<sup>6</sup>A levels in HIV-1 RNA by eraser KO in virus-producing cells reduces  
181 *IFN-I* induction in differentiated monocytic cells.



182

183 **m<sup>6</sup>A-defective HIV-1 RNA induces IFN-I expression through IRF3 and IRF7**

184 **phosphorylation.**

185 We next investigated pharmacological inhibition of m<sup>6</sup>A modification using 3-deazaadenosine  
186 (DAA), an inhibitor of S-Adenosylhomocysteine (SAH) hydrolase that can catalyze the  
187 reversible hydrolysis of SAH to adenosine and homocysteine [33]. DAA causes SAH  
188 accumulation thereby elevating the ratio of SAH to S-adenosylmethionine (SAM), a substrate of  
189 m<sup>6</sup>A modification, and subsequent inhibition of SAM-dependent methyltransferases [33]. DAA-  
190 treatment of HEK293T cells did not affect HIV-1 production and release, but reduced m<sup>6</sup>A level  
191 in HIV-1 RNA 7-fold compared to control cells (Fig. 5A and 5B). Transfection of PMA-  
192 differentiated U937 cells with purified RNA from HIV-1 produced from DAA-treated HEK293T  
193 cells (DAA-HIV-1) induced 15-fold and 2.3-fold higher *IFN-α* and *IFN-β* expression ( $P <$   
194  $0.0005$ ), respectively (Fig. 5C and 5D). Moreover, infection of PMA-differentiated U937 cells  
195 with DAA- HIV-1 induced a 2-3-fold increase in *IFN-I* expression ( $P < 0.0005$ ) compared to  
196 viruses from control HEK293T cells (Fig. 5E and 5F). These data further validate that m<sup>6</sup>A of  
197 HIV-1 RNA suppresses IFN-I induction in differentiated monocytic cells.

198 Because IFN-I expression is predominately driven by IRF3 and IRF7 after their  
199 activation by phosphorylation upon virus infections [21, 34], we tested whether DAA-HIV  
200 affected phosphorylation of IRF3 and IRF7. Compared to mock-infected U937 cells, control  
201 HIV-1 and DAA-HIV-1 induced strong phosphorylation of IRF3 and IRF7 in differentiated  
202 U937 cells at 4 h post-infection (Fig. 5G). Notably, phosphorylation of IRF3 and IRF7 was 1.7-  
203 fold and 1.2-fold higher in U937 cells infected with DAA-HIV-1 relative to control HIV-1,  
204 respectively (Fig. 5G). These results suggest that inhibition of HIV-1 RNA m<sup>6</sup>A modification

205 triggers innate immune responses by inducing IRF3/7-mediated IFN-I expression in myeloid  
206 cells.

207

208 **RIG-I, but not MDA5, contributes to m<sup>6</sup>A modification of HIV-1 RNA induced IFN-I**  
209 **expression.**

210 To characterize the cellular sensing mechanisms of m<sup>6</sup>A-defective HIV-1 RNA, RIG-I and  
211 MDA5 in U937 cells were silenced by KO and shRNA, respectively. RIG-I-KO U937 cells were  
212 constructed and undetectable RIG-I expression was confirmed (Fig. 6A). To test whether these  
213 cells responded to RNA stimulation, poly(I:C) was transfected into cells and *IFN-I* expression  
214 was measured. Compared to untransfected cells (mock), poly(I:C) transfection induced high  
215 levels of *IFN-I* expression in RIG-I-KO and control U937 cells (Fig. 6B). As expected, the  
216 induction of *IFN-I* by poly(I:C) was significantly reduced by 2-fold in RIG-I-KO U937 cells ( $P$   
217  $< 0.005$ ) compared to control cells (Fig. 6B), confirming that RIG-I acted as an RNA sensor to  
218 induce *IFN-I* expression in these cells. In control U937 cells, transfection of single m<sup>6</sup>A-  
219 modified HIV-1 RNA oligos induced lower *IFN-I* expression ( $P < 0.0001$ ) compared to  
220 unmethylated RNA oligo counterparts (Fig. 6C and 6D). However, in RIG-I-silenced U937 cells,  
221 transfection of m<sup>6</sup>A-modified HIV-1 RNA oligos had no effect on *IFN-I* expression relative to  
222 unmethylated control oligos (Fig. 6C and 6D), suggesting a pivotal role of RIG-I in sensing  
223 m<sup>6</sup>A-defective HIV-1 RNA.

224 Furthermore, we examined the potential role of MDA5 in sensing m<sup>6</sup>A-defective HIV-1  
225 RNA in monocytic cells. MDA5 expression was substantially reduced in differentiated U937  
226 cells with MDA5 knockdown (shMDA5) compared to vector control (shCon) cells (Fig. 7A). As  
227 a positive control, poly(I:C) transfection induced high levels of *IFN-I* expression in both shCon

228 and shMDA5 U937 cells. As expected, poly(I:C) transfection into shMDA5 U937 cells  
229 significantly decreased *IFN-I* levels relative to shCon cells (Fig. 7B). These cells were then  
230 examined for their ability to induce *IFN-I* expression by HIV-1 5' UTR RNA oligos with or  
231 without single m<sup>6</sup>A modification [32]. Compared to unmethylated HIV-1 RNA oligos,  
232 transfection of m<sup>6</sup>A-modified HIV-1 RNA oligos reduced *IFN-I* expression in both shCon and  
233 shMDA5 U937 cells (Fig. 7C and 7D), suggesting that MDA5 is not a specific cellular sensor to  
234 detect m<sup>6</sup>A-defective HIV-1 RNA in differentiated monocytic cells.

235

### 236 **HIV-1 infected patients have higher level of m<sup>6</sup>A modification in the RNA of PBMCs.**

237 To explore the significance of m<sup>6</sup>A modifications in HIV-1-infected individuals and investigate  
238 the effect of ART on m<sup>6</sup>A levels, we measured the levels of m<sup>6</sup>A and *IFN-I* mRNA in immune  
239 cells from HIV-1 viremic patients in comparison with healthy control donors and HIV-1 patients  
240 on ART. We obtained PBMCs from healthy control donors (n=9), HIV-1 viremic patients (n=6)  
241 with different viral load pre-therapy, and HIV-1-infected individuals on ART (n=16) whose viral  
242 load was undetectable for a minimum of 6 months (<20 copies/mL) (supplemental Table S1).  
243 The average m<sup>6</sup>A level in total RNA of PBMCs from HIV-1 viremic patients was significantly  
244 higher ( $P < 0.005$ ) compared to that from patients on ART (Fig. 8A and Supplemental Fig. S1A),  
245 suggesting an inverse correlation between viral load and m<sup>6</sup>A level of patient PBMCs. A visible,  
246 but not statistically significant increase ( $P = 0.27$ ) in cellular RNA m<sup>6</sup>A level was observed in  
247 viremic patients compared to healthy individuals (Fig. 8A and Fig. S1A). This observation is  
248 also consistent with our previous results showing that HIV-1 infection or treatment of cells with  
249 HIV-1 envelope proteins (Env) upregulated m<sup>6</sup>A levels in primary CD4<sup>+</sup> T-cells *in vitro* [30]. It

250 is possible that Env shedding from HIV-1 viremic patients could upregulate m<sup>6</sup>A levels in  
251 PBMCs.

252 Next, the levels of *IFN-I* mRNA in PMBCs were measured to analyze potential  
253 correlations with the RNA m<sup>6</sup>A levels. Compared to PBMCs from healthy donors, there was a  
254 trend of increase in *IFN-α* expression, and a significant increase in *IFN-β* expression in PBMCs  
255 from the viremic patients (Fig. 8B and 8C). Compared to PBMCs from the viremic patients, a  
256 significant decrease in both *IFN-α* and *IFN-β* expression ( $P < 0.005$ ) was observed in patients on  
257 ART (Fig. 7B and 7C), suggesting that HIV-1 suppression by ART reduces innate immune  
258 responses to viral infection. Consistent with our results, a previous study [35] also reported  
259 similar results of decreased IFN- $\alpha$  expression in HIV-1 patients on ART compared to patients  
260 without ART.

261 Enhanced m<sup>6</sup>A levels in viremic patients could not be attributed to inherent differences in  
262 the levels of m<sup>6</sup>A writers and erasers, because there was no significant change in the expression  
263 of METTL3, FTO and ALKBH5 in PBMCs from the three groups (Fig. 8D and Fig. S1B).  
264 However, a slight increased level of METTL14 expression was observed in PBMCs from  
265 patients with ART compared to viremic patients (Fig. 8D and Fig. S1B). Together, these results  
266 suggest that HIV-1 infection upregulates the m<sup>6</sup>A level of cellular RNA in PBMCs from viremic  
267 patients without altering the expression of the writers and erasers.

268

## 269 Discussion

270 HIV-1 genomic RNA contains 10-14 sites of m<sup>6</sup>A modifications in the 5'-, 3'-UTR and  
271 several coding regions [17-19]. Recent studies indicate that m<sup>6</sup>A modification has important  
272 effects on HIV-1 replication, gene expression, and host responses to viral infection [30, 32, 36].

273 It has been shown that cellular enzymes involved in RNA m<sup>6</sup>A modifications negatively regulate  
274 the innate immune response to infection of human cytomegalovirus, influenza A virus,  
275 adenovirus, or vesicular stomatitis virus by targeting the IFN-I pathway [37, 38]. A recent study  
276 showed that m<sup>6</sup>A modifications of human metapneumovirus RNA mimic the host RNA to avoid  
277 RIG-I-mediated innate immune sensing, and thereby reduce the production of IFN-I and enhance  
278 viral replication [39]. However, it remains unknown whether m<sup>6</sup>A modifications of HIV-1 RNA  
279 have any impact on innate immune responses.

280 In this study, we show that m<sup>6</sup>A modifications of HIV-1 RNA act as a negative regulator  
281 of IFN-I induction by avoiding RIG-I-mediated RNA sensing in PMA-differentiated U937 cells.  
282 We observed that two different HIV-1 RNA oligos of the HIV-1 5'-UTR containing a single  
283 m<sup>6</sup>A-modification significantly reduced IFN-I induction relative to their unmodified RNA  
284 counterparts. The different inhibitory effects on IFN-I induction by two m<sup>6</sup>A-modified RNA  
285 oligos compared to their unmodified counterparts might be due to different sequences or  
286 conformation of the RNA fragments [32]. We also demonstrated that HIV-1 RNA with  
287 decreased m<sup>6</sup>A levels enhanced IFN-I expression, but HIV-1 RNA with increased m<sup>6</sup>A  
288 modifications had opposite effects. Our results suggest that HIV-1 genomic RNA and viral  
289 transcripts are masked by m<sup>6</sup>A modifications to avoid RIG-I-mediated sensing and IFN-I  
290 induction during viral infection. Thus, HIV-1 has likely evolved an immune evasion strategy  
291 through m<sup>6</sup>A modification of viral RNA (Fig. S2).

292 Several RNA modifications, such as N-1-methylpseudouridine, 5-methylcytidine (m<sup>5</sup>C),  
293 5-hydroxymethylcytidine, 5-methoxycytidine, and 2' fluoro-deoxyribose, have significant impact  
294 on RIG-I- and MDA5-mediated RNA sensing [40]. In addition to m<sup>6</sup>A modification, HIV-1  
295 genomic RNA contains eight types of epitranscriptomic modifications that are higher than the

296 average cellular mRNA, with m<sup>5</sup>C and 2'-O-methyl modifications being most prevalent [41]. It is  
297 possible that HIV-1 RNA exploits multiple epitranscriptomic modifications to avoid innate  
298 sensing as mechanisms of immune evasion. This possibility may explain how HIV-1 is able to  
299 avoid innate immune responses to establish persistent and latent infection even in patients on  
300 combined ART [31].

301 The IFN-I gene itself is m<sup>6</sup>A-modified and targets its destabilization for the maintenance  
302 of homeostatic state in mouse and humans [38]. Rubio *et al.* showed that, following human  
303 cytomegalovirus infection, depletion of METTL14 or increase in ALKBH5 proteins leads to  
304 decrease level of m<sup>6</sup>A in IFN- $\beta$  gene and stabilizes and elevates the IFN-I response [37]. In this  
305 study, we observed increased m<sup>6</sup>A levels in cellular RNA of PBMCs from HIV-1 viremic  
306 patients compared to HIV-1 suppressed patients on ART. However, we did not observe  
307 significant changes in the levels of m<sup>6</sup>A writers and erasers in PMBCs from healthy donor, HIV-  
308 1 viremic patients, and HIV-1 patients on ART. These results are consistent with our previous  
309 data showing increased m<sup>6</sup>A levels in HIV-1 infected primary CD4<sup>+</sup> T-cells in the absence of  
310 altered expression of m<sup>6</sup>A writers or erasers [30]. It is possible that HIV-1 may modulate the  
311 activity or localization of writers or eraser, thereby upregulating m<sup>6</sup>A levels in HIV-1 infected  
312 cells. It remains to be established whether m<sup>6</sup>A modification of HIV-1 RNA regulate innate  
313 immune responses in primary CD4<sup>+</sup> T-cells or macrophages.

314 We found that m<sup>6</sup>A-modified HIV-1 reduces the activation of IRF3 and IRF7 through  
315 RIG-I-mediated signaling to suppress IFN-I induction. However, it remains unclear how m<sup>6</sup>A  
316 modifications of HIV-1 RNA reduces phosphorylation of IRF3 and IRF7 during early stage of  
317 HIV-1 infection. Previous studies suggest that HIV-1 proteins can target several cellular RNA  
318 and DNA sensors including RIG-I to surpass the IFN-I response [42-45]. Moreover, HIV-1 can

319 also target downstream proteins in the IFN-I pathway including IRF3 and IRF7 to contribute to  
320 chronic and persistent infection [46-50]. For example, HIV-1 Vpr protein mediates degradation  
321 of IRF3 to avoid the innate antiviral immune response [51].

322 Durbin *et al.* showed that a RIG-I-activating RNA ligand, the 106-nucleotide polyU/UC  
323 sequence derived from the 3' UTR of hepatitis C virus with m<sup>6</sup>A modification bound RIG-I with  
324 low affinity and did not trigger the conversion to the activated RIG-I conformer and thus has an  
325 immunosuppressive potential [40]. Our data indicated that m<sup>6</sup>A-defective HIV-1 RNA enhanced  
326 RIG-I-mediated RNA sensing and IFN-I induction in cells. Further studies are needed to  
327 examine whether the m<sup>6</sup>A-modified HIV-1 RNA binds RIG-I with a low affinity, which might  
328 be the possible cause of reduced IFN-I induction during viral infection.

329 In summary, our study uncovered a previously unidentified strategy of how HIV-1 RNA  
330 escapes the host antiviral innate immune system through m<sup>6</sup>A modifications of its RNA genome.  
331 HIV-1 RNA m<sup>6</sup>A modifications can act as an immune suppressor of RIG-I-mediated viral RNA  
332 sensing. Our findings suggest that pharmacological reduction in m<sup>6</sup>A modification of HIV-1  
333 RNA may enhance IFN-I-mediated innate antiviral immune responses, thereby inhibiting viral  
334 replication.

335

## 336 **Materials and Methods**

337 **Cell culture.** HEK293T cell line was a kind gift from Vineet KewalRamani (National Cancer  
338 Institute, USA) and maintained in complete Dulbecco's modified Eagle's medium (DMEM) as  
339 described [32]. U937 cell line was obtained from the American Type Culture Collection (ATCC)  
340 and maintained in complete RPMI-1640 medium as described [52]. All the cell lines were

341 maintained at 37 °C in 5% CO<sub>2</sub> and tested negative for mycoplasma contamination using a  
342 universal mycoplasma detection kit (ATCC 30-1012K) as described [53].

343

344 **Plasmids and HIV-1 RNA oligos.** The HIV-1 proviral DNA construct pNL4-3 was used to  
345 generate viral stocks as described [19]. For over-expression of the m<sup>6</sup>A erasers, the  
346 corresponding control vectors, pCMV6-FTO, pCMV-ALKBH5 were described [9, 54]. For  
347 knockout of eraser genes, CRISPR-Cas9 vectors containing sgControl, sgFTO, and sgALKBH5  
348 were used as described [38]. For RIG-I knockout, pCR-BluntII-Topo-sgRIGI-1 and 2 vectors  
349 were described [55], which were kindly provided by Dr. Stacy Horner (Duke University, USA),  
350 and the plasmid hCas9 (catalog no. 41815, Addgene) was described [56]. For MDA5 and RIG-I  
351 knockdown, shControl, shMDA5 and shRIG-I plasmids [29] were kindly provided by Dr.  
352 Yamina Bennasser (Université de Montpellier, France). Four RNA oligo sequences are from the  
353 5' UTR of HIV-1 genomic RNA (NL4-3 strain) with or without a single m<sup>6</sup>A site [32], which  
354 were commercially synthesized (Integrated DNA Technologies). The sequences and the location  
355 of the m<sup>6</sup>A sites in the conserved GGACU motifs of the HIV-1 genome were described [32] and  
356 are listed below: RNA oligo 1 (nt. 235-281, the m<sup>6</sup>A-modified adenosine is nt. 241):

357 5'-CGCAGGACUCGGCUUGCUGGAGACGGCAAGAGGCGAGGGGCG-3'.

358 To eliminate RNA dimerization in our previous RNA binding assays [32], the original dimer  
359 initiation sequence of HIV-1 (AAGCGCGC) in oligo 1 was replaced with the underlined

360 nucleotides GAG. RNA oligo 2 (nt. 176-217, the m<sup>6</sup>A-modified adenosine is nt. 197):

361 5'-AGCAGUGGCGCCCGAACAGGGACUUGAAAGCGAAAGUAAAGC-3'.

362



363 **Generation of U937 cells with MDA5 knockdown or RIG-I knockout, and HEK293T cells**  
364 **with FTO or ALKBH5 knockout.** For MDA5 knockdown U937 cell line construction,  
365 HEK293T cells were transfected with shControl or shMDA5, together with pMD2.G and  
366 psPAX2 plasmids by polyethyleneimine (PEI) [53]. At 48 h post-transfection, lentiviruses were  
367 harvested and purified to infect U937 cells for 48 h and then the U937 cells were selected in  
368 RPMI-1640 media with 1 µg/mL puromycin. To generate RIG-I knockout cells, pCR-BluntII-  
369 Topo-sgRIGI-I or pCR-BluntII-ToposgRIGI-2, along with hCas9, which has neomycin (G148)  
370 resistance, were transfected into U937 cells by TransIT mRNA transfection kit (mirus, USA) for  
371 48 h according to the manufacturer's protocol. Then, G418 (1 mg/mL) was added to transfected  
372 cells for 8 days to select RIG-I knockout U937 cells, which were confirmed by Western blotting.  
373 For Control, FTO, and ALKBH5 knockout HEK293T cell generation, HEK293T cells were  
374 transfected with corresponding single guide RNAs (sgRNAs), together with pMD2.G and  
375 psPAX2 plasmids. At 48 h post-transfection, lentiviruses were collected to infect fresh  
376 HEK293T cells for 48 h. Then, the single clones were selected by 1 µg/mL puromycin in 96 well  
377 plates. The KO cells were confirmed by DNA sequencing and for specific protein expression by  
378 Western blotting.

379

380 **Dot immunoblotting of m<sup>6</sup>A modification in RNA.** RNA was extracted from purified and  
381 concentrated HIV-1 stocks by using TRIzol (Invitrogen) or RNA purification kit (Qiagen). The  
382 synthesized RNA oligos were directly used for dot-blot assays as described [30]. Briefly, HIV-1  
383 RNA or RNA oligos (diluted to 100 µL using 1 mM EDTA) were mixed with 60 µL of 20×  
384 saline-sodium citrate (SSC) buffer (3 M NaCl, 0.3 M trisodium citrate) and 40 µL of 37%  
385 formaldehyde (Invitrogen) and incubated at 65 °C for 30 min. Nitrocellulose membrane (162-

386 0115, Bio-Rad) or nylon membranes (11209299001, Roche) were pre-soaked with 10X SSC for  
387 5 min and assembled in dot-blot apparatus (Bio-Rad) with vacuum-on. Equal amounts of RNA  
388 were transferred to nitrocellulose or nylon membranes, then membranes were washed twice with  
389 200  $\mu$ L of 10 $\times$  SSC buffer. Nylon membranes were washed once with TBST buffer (20 mM Tris,  
390 0.9% NaCl, and 0.05% Tween 20) for 5 min and stained with methylene blue staining (MB119,  
391 Molecular Research Center) for 2-5 sec followed by two or three washes with ddH<sub>2</sub>O.  
392 Nitrocellulose membranes were blocked with 5% milk in TBST buffer and used to detect m<sup>6</sup>A  
393 levels by probing with m<sup>6</sup>A specific antibodies (Synaptic Systems; 202 003). Images were taken  
394 by Amersham Biosciences Imager 600 (GE Healthcare) and analyzed by ImageJ software  
395 (National Institutes of Health). Densitometry quantification of relative RNA m<sup>6</sup>A levels was  
396 normalized to MB staining as described [30].

397

398 ***In vitro* FTO demethylation of HIV-1 RNA m<sup>6</sup>A.** Demethylation of HIV-1 RNA m<sup>6</sup>A was  
399 performed with recombinant FTO treatment of purified HIV-1 RNA. Briefly, 500 ng HIV-1  
400 RNA were used for FTO *in vitro* treatment in 100  $\mu$ L reaction buffer containing 50 mM HEPES  
401 buffer (pH7.0), 75  $\mu$ M (NH<sub>4</sub>)<sub>2</sub>Fe (SO<sub>4</sub>)<sub>2</sub>•6H<sub>2</sub>O, 2 mM L-ascorbic acid, 300  $\mu$ M L-ascorbic acid,  
402 200U RNAsin, 5  $\mu$ g/mL BSA, and 0.2 nmol FTO protein. The reaction was performed at 37 °C  
403 for 1 hr and then stopped by adding 5 mM EDTA. Finally, RNA samples were denatured at  
404 70 °C for 2 min and quickly put into ice for m<sup>6</sup>A detection.

405

406 **HIV-1 production, p24 quantification, U937 cells transfection and HIV-1 infection assays.**

407 HIV-1 stocks were generated by transfection of HEK293T cells with the proviral DNA pNL4-3  
408 using PEI as described [53]. Cell culture medium was exchanged at 6-8 h post-transfection with

409 supernatants and was harvested at 48 h. The cell culture media containing viruses were filtered  
410 (0.45  $\mu$ m) and purified by 25% sucrose using an SW28 rotor (Beckman Coulter) at 141,000g for  
411 90 min. The pellet was resuspended with PBS and digested with DNase I (Turbo, Invitrogen) for  
412 30 min at 37 °C. To extract HIV-1 genome RNA, concentrated HIV-1 virions were lysed by  
413 Trizol (Invitrogen) and RNA was purified by phenolic-chloroform sedimentation and  
414 isopropanol precipitation. For transfection, cells were treated with 100 ng/mL phorbol 12-  
415 myristate 13-acetate (PMA) for 24 h and changed with fresh RPMI-1640 media for another 24 h.  
416 PMA-differentiated U937 cells were then transfected with TransIT mRNA transfection kits  
417 (Mirus) according to the manufacturer protocol. At 16 h post-transfection, cells were harvest for  
418 RT-qPCR analysis. For infection assays, HIV-1 p24 levels were quantified by an enzyme-linked  
419 immunosorbent assay (ELISA) using anti-p24-coated plates (The AIDS and Cancer Virus  
420 Program, NCI-Frederick, MD) as described [30]. PMA-differentiated U937 cells were infected  
421 by equal amounts of HIV-1 (250 pg of p24) for 16 h and then cells were collected for Western  
422 blotting or RT-qPCR analysis.

423

424 **Antibodies and immunoblotting.** The antibodies used in this study were: anti-GAPDH  
425 (AHP1628, Bio-Rad), anti-FLAG (F1804, Sigma-Aldrich), anti-METTL3 (15073-1-AP,  
426 Proteintech Group), anti-METTL14 (HPA038002, Sigma-Aldrich), anti-FTO (ab124892,  
427 Abcam), anti-ALKBH5 (HPA007196, Sigma-Aldrich), anti-MDA5 (D74E4, Cell signaling),  
428 anti-RIG-I (D14G6, Cell signaling), anti-HIV-1 Gag (clone #24-2, the NIH AIDS Reagent  
429 Program), anti-IRF3 (124399, Abcam), anti-phospho-IRF3 (49475, Cell Signaling), anti-IRF7  
430 (SC-9083, Santa Cruz), anti-phospho-IRF7 (5184, Cell Signaling) and anti-m<sup>6</sup>A polyclonal  
431 rabbit Ab (202003, Synaptic Systems). Cells were harvested and lysed in cell lysis buffer (Cell

432 Signaling) supplemented with protease inhibitor cocktails (Sigma-Aldrich). Immunoblotting was  
433 performed as described [30]. Detection of GAPDH expression was used as a loading control.

434

435 **Quantitative RT-PCR.** Real-time quantitative RT-PCR (qRT-PCR) was performed as described  
436 [53] to assess the relative levels of *IFN- $\alpha$*  and *IFN- $\beta$*  mRNA expression in cells induced by HIV-  
437 1 RNA transfection or HIV-1 infection. Following primers (IDT) were used:

438 *IFN- $\alpha$* , F 5'-GTACTGCAGAATCTCTCCTTTCTCCT-3'

439 *IFN- $\alpha$* , R 5'-GTGTCTAGATCTGACAACCTCCCAGG-3'

440 *IFN- $\beta$* , F 5'-AACTTTGACATCCCTGAGGAGATTAAGC-3'

441 *IFN- $\beta$* , R 5'-GACTATGGTCCAGGCACAGTGACTGTAC-3'

442 *GAPDH*, F 5'-GGAAGGTGAAGGTCGGAGTCAACGG-3'

443 *GAPDH*, R 5'-CTGTTGTCATACTTCTCATGGTTCAC-3'

444

445 **Ethics statement.** The study using human PBMCs from healthy control subjects and HIV-  
446 positive individuals has been approved by the Institutional Review Board of the University of  
447 Iowa. The study was conducted according to the Declaration of Helsinki guidelines.

448

449 **PBMCs from healthy donors and HIV-1 patients.** Healthy control subjects and HIV-positive  
450 individuals attending the University of Iowa HIV Clinic who were receiving ART and had HIV-  
451 1 viral load levels below the limit of detection (< 20 copies/mL) for over 6 months were invited  
452 to participate in these studies, and all provided written informed consent. HIV-1 viral load was  
453 determined using the COBAS® AmpliPrep/COBAS® TaqMan HIV-1 test (Roche). PBMCs  
454 were purified using BD Vacutainer® CPT™ Mononuclear cell preparation tubes (BD

455 Biosciences) as recommended by the manufacturer. Cells were stored in 92% fetal calf serum,  
456 DMSO in liquid nitrogen until use. PBMCs were obtained with 9 healthy donors, 6 HIV-1  
457 viremic patients, and 16 HIV-1 patients treated with ART (Supplemental Table 1). Both viral  
458 RNA and protein were isolated from these PBMCs at the same day using Ambion Paris RNA  
459 and protein extraction kit (ThermoFisher Scientific) and stored in -80 °C until use. The RNA was  
460 quantitated using the NanoDrop spectrophotometer (ThermoFisher Scientific) and was used for  
461 m<sup>6</sup>A dot-blot detection (200 ng) and *IFN-α* and *IFN-β* mRNA analyses as described [53]. The  
462 protein was quantitated using Pierce BCA reagent (ThermoFisher Scientific) and subjected to  
463 Western blot analysis of the m<sup>6</sup>A writers and erasers.

464

465 **Statistical analyses.** Data were analyzed using either Mann-Whitney's t-test or the one-way  
466 analysis of variance (ANOVA) with Prism software and statistical significance was defined as *P*  
467 < 0.05. All experiments were repeated at least three times.

468

#### 469 **Acknowledgments**

470 This work was supported in part by National Institutes of Health grants R01AI150343 and  
471 R01AI141495 (to L. W.). We thank Alexis Hawkins for technical assistance in detection cellular  
472 m<sup>6</sup>A levels of PBMCs, and the Wu lab members for helpful discussions and suggestions. We  
473 also thank Michael Cahill for outstanding technical support. The authors appreciate generous  
474 reagents from Drs. Yamina Bennasser, Stacy Horner, Vineet KewalRamani, Noam Stern-  
475 Ginossar, and the NIH AIDS Reagent Program.

476

#### 477 **Author contributions**

478 S.C., S.K., and N.T. performed experiments and contributed to manuscript preparation. J.W. and  
479 J.T.S. provided PBMCs from HIV-1 patients and uninfected individuals, and helped data  
480 analyses. L.H. and C.H. provided recombinant FTO and the *in vitro* m<sup>6</sup>A demethylation protocol.  
481 All authors analyzed data and contributed to experiment design. S.C. and S.K. drafted the  
482 manuscript. L.W. conceived the study, supervised the work, and revised the manuscript. All  
483 authors contributed to manuscript editing and revision.

484

485 **Competing interests:** The authors declare no competing interests.

486

## 487 **References**

- 488 1. Roundtree IA, Evans ME, Pan T, He C. Dynamic RNA Modifications in Gene Expression  
489 Regulation. *Cell*. 2017;169(7):1187-200. Epub 2017/06/18. doi: 10.1016/j.cell.2017.05.045.  
490 PubMed PMID: 28622506; PubMed Central PMCID: PMC5657247.
- 491 2. Fu Y, Dominissini D, Rechavi G, He C. Gene expression regulation mediated through  
492 reversible m(6)A RNA methylation. *Nat Rev Genet*. 2014;15(5):293-306. doi:  
493 10.1038/nrg3724. PubMed PMID: 24662220.
- 494 3. Meyer KD, Jaffrey SR. Rethinking m(6)A Readers, Writers, and Erasers. *Annu Rev Cell*  
495 *Dev Biol*. 2017;33:319-42. Epub 2017/08/02. doi: 10.1146/annurev-cellbio-100616-060758.  
496 PubMed PMID: 28759256; PubMed Central PMCID: PMC5963928.
- 497 4. Zhao BS, Roundtree IA, He C. Post-transcriptional gene regulation by mRNA  
498 modifications. *Nat Rev Mol Cell Biol*. 2017;18(1):31-42. doi: 10.1038/nrm.2016.132.  
499 PubMed PMID: 27808276; PubMed Central PMCID: PMC5167638.
- 500 5. Shi H, Wei J, He C. Where, When, and How: Context-Dependent Functions of RNA  
501 Methylation Writers, Readers, and Erasers. *Mol Cell*. 2019;74(4):640-50. doi:  
502 10.1016/j.molcel.2019.04.025. PubMed PMID: 31100245; PubMed Central PMCID:  
503 PMC527355.
- 504 6. Liu J, Yue Y, Han D, Wang X, Fu Y, Zhang L, et al. A METTL3-METTL14 complex  
505 mediates mammalian nuclear RNA N6-adenosine methylation. *Nat Chem Biol*.

- 506 2014;10(2):93-5. doi: 10.1038/nchembio.1432. PubMed PMID: 24316715; PubMed Central  
507 PMID: PMC3911877.
- 508 7. Ping XL, Sun BF, Wang L, Xiao W, Yang X, Wang WJ, et al. Mammalian WTAP is a  
509 regulatory subunit of the RNA N6-methyladenosine methyltransferase. *Cell Res.*  
510 2014;24(2):177-89. doi: 10.1038/cr.2014.3. PubMed PMID: 24407421; PubMed Central  
511 PMID: PMC3915904.
- 512 8. Jia G, Fu Y, Zhao X, Dai Q, Zheng G, Yang Y, et al. N6-methyladenosine in nuclear RNA  
513 is a major substrate of the obesity-associated FTO. *Nat Chem Biol.* 2011;7(12):885-7. doi:  
514 10.1038/nchembio.687. PubMed PMID: 22002720; PubMed Central PMID:  
515 PMC3218240.
- 516 9. Zheng G, Dahl JA, Niu Y, Fedorcsak P, Huang CM, Li CJ, et al. ALKBH5 is a mammalian  
517 RNA demethylase that impacts RNA metabolism and mouse fertility. *Mol Cell.*  
518 2013;49(1):18-29. doi: 10.1016/j.molcel.2012.10.015. PubMed PMID: 23177736; PubMed  
519 Central PMID: PMC3646334.
- 520 10. Sommer S, Salditt-Georgieff M, Bachenheimer S, Darnell JE, Furuichi Y, Morgan M, et al.  
521 The methylation of adenovirus-specific nuclear and cytoplasmic RNA. *Nucleic Acids Res.*  
522 1976;3(3):749-65. doi: 10.1093/nar/3.3.749. PubMed PMID: 1272797; PubMed Central  
523 PMID: PMC342938.
- 524 11. Bondurant M, Hashimoto S, Green M. Methylation pattern of genomic RNA from Moloney  
525 murine leukemia virus. *J Virol.* 1976;19(3):998-1005. PubMed PMID: 972437; PubMed  
526 Central PMID: PMCPMC354940.
- 527 12. Thomason AR, Brian DA, Velicer LF, Rottman FM. Methylation of high-molecular-weight  
528 subunit RNA of feline leukemia virus. *J Virol.* 1976;20(1):123-32. PubMed PMID: 185408;  
529 PubMed Central PMID: PMC354973.
- 530 13. Beemon K, Keith J. Localization of N6-methyladenosine in the Rous sarcoma virus  
531 genome. *J Mol Biol.* 1977;113(1):165-79. doi: 10.1016/0022-2836(77)90047-x. PubMed  
532 PMID: 196091.
- 533 14. Moss B, Gershowitz A, Stringer JR, Holland LE, Wagner EK. 5'-Terminal and internal  
534 methylated nucleosides in herpes simplex virus type 1 mRNA. *J Virol.* 1977;23(2):234-9.  
535 PubMed PMID: 196108; PubMed Central PMID: PMC515825.

- 536 15. Aloni Y, Dhar R, Khoury G. Methylation of nuclear simian virus 40 RNAs. *J Virol.*  
537 1979;32(1):52-60. PubMed PMID: 232187; PubMed Central PMCID: PMCPMC353526.
- 538 16. Williams GD, Gokhale NS, Horner SM. Regulation of Viral Infection by the RNA  
539 Modification N6-Methyladenosine. *Annu Rev Virol.* 2019;6(1):235-53. doi:  
540 10.1146/annurev-virology-092818-015559. PubMed PMID: 31283446; PubMed Central  
541 PMCID: PMCPMC6884077.
- 542 17. Lichinchi G, Gao S, Saletore Y, Gonzalez GM, Bansal V, Wang Y, et al. Dynamics of the  
543 human and viral m(6)A RNA methylomes during HIV-1 infection of T cells. *Nat Microbiol.*  
544 2016;1:16011. doi: 10.1038/nmicrobiol.2016.11. PubMed PMID: 27572442; PubMed  
545 Central PMCID: PMCPMC6053355.
- 546 18. Kennedy EM, Bogerd HP, Kornepati AV, Kang D, Ghoshal D, Marshall JB, et al.  
547 Posttranscriptional m(6)A Editing of HIV-1 mRNAs Enhances Viral Gene Expression. *Cell*  
548 *Host Microbe.* 2016;19(5):675-85. doi: 10.1016/j.chom.2016.04.002. PubMed PMID:  
549 27117054; PubMed Central PMCID: PMC4867121.
- 550 19. Tirumuru N, Zhao BS, Lu W, Lu Z, He C, Wu L. N(6)-methyladenosine of HIV-1 RNA  
551 regulates viral infection and HIV-1 Gag protein expression. *eLife.* 2016;5. doi:  
552 10.7554/eLife.15528. PubMed PMID: 27371828; PubMed Central PMCID:  
553 PMCPMC4961459.
- 554 20. Shulman Z, Stern-Ginossar N. The RNA modification N(6)-methyladenosine as a novel  
555 regulator of the immune system. *Nat Immunol.* 2020;21(5):501-12. doi: 10.1038/s41590-  
556 020-0650-4. PubMed PMID: 32284591.
- 557 21. Chan YK, Gack MU. Viral evasion of intracellular DNA and RNA sensing. *Nat Rev*  
558 *Microbiol.* 2016;14(6):360-73. doi: 10.1038/nrmicro.2016.45. PubMed PMID: 27174148;  
559 PubMed Central PMCID: PMCPMC5072394.
- 560 22. Schlee M, Hartmann G. Discriminating self from non-self in nucleic acid sensing. *Nat Rev*  
561 *Immunol.* 2016;16(9):566-80. doi: 10.1038/nri.2016.78. PubMed PMID: 27455396;  
562 PubMed Central PMCID: PMCPMC7097691.
- 563 23. Rehwinkel J, Gack MU. RIG-I-like receptors: their regulation and roles in RNA sensing.  
564 *Nat Rev Immunol.* 2020:1-15. doi: 10.1038/s41577-020-0288-3. PubMed PMID: 32203325;  
565 PubMed Central PMCID: PMCPMC7094958.



- 566 24. Rasaiyaah J, Tan CP, Fletcher AJ, Price AJ, Blondeau C, Hilditch L, et al. HIV-1 evades  
567 innate immune recognition through specific cofactor recruitment. *Nature*.  
568 2013;503(7476):402-5. doi: 10.1038/nature12769. PubMed PMID: 24196705; PubMed  
569 Central PMCID: PMC3928559.
- 570 25. Cingoz O, Goff SP. HIV-1 Is a Poor Inducer of Innate Immune Responses. *mBio*.  
571 2019;10(1). Epub 2019/02/12. doi: 10.1128/mBio.02834-18. PubMed PMID: 30755516;  
572 PubMed Central PMCID: PMC6372803.
- 573 26. Ranganath N, Sandstrom TS, Fadel S, Cote SC, Angel JB. Type I interferon responses are  
574 impaired in latently HIV infected cells. *Retrovirology*. 2016;13(1):66. doi: 10.1186/s12977-  
575 016-0302-9. PubMed PMID: 27613235; PubMed Central PMCID: PMC5017046.
- 576 27. He B, Tran JT, Sanchez DJ. Manipulation of Type I Interferon Signaling by HIV and AIDS-  
577 Associated Viruses. *J Immunol Res*. 2019;2019:8685312. doi: 10.1155/2019/8685312.  
578 PubMed PMID: 31089479; PubMed Central PMCID: PMC6476103.
- 579 28. Wu L. HIV Evades Immune Surveillance by Methylation of Viral RNA. *Biochemistry*.  
580 2019;58(13):1699-700. doi: 10.1021/acs.biochem.9b00152. PubMed PMID: 30892021;  
581 PubMed Central PMCID: PMC6445747.
- 582 29. Ringeard M, Marchand V, Decroly E, Motorin Y, Bennasser Y. FTSJ3 is an RNA 2'-O-  
583 methyltransferase recruited by HIV to avoid innate immune sensing. *Nature*.  
584 2019;565(7740):500-4. doi: 10.1038/s41586-018-0841-4. PubMed PMID: 30626973.
- 585 30. Tirumuru N, Wu L. HIV-1 envelope proteins up-regulate N (6)-methyladenosine levels of  
586 cellular RNA independently of viral replication. *J Biol Chem*. 2019;294(9):3249-60. doi:  
587 10.1074/jbc.RA118.005608. PubMed PMID: 30617182; PubMed Central PMCID:  
588 PMC6398121.
- 589 31. Cohn LB, Chomont N, Deeks SG. The Biology of the HIV-1 Latent Reservoir and  
590 Implications for Cure Strategies. *Cell Host Microbe*. 2020;27(4):519-30. doi:  
591 10.1016/j.chom.2020.03.014. PubMed PMID: 32272077; PubMed Central PMCID:  
592 PMC67219958.
- 593 32. Lu W, Tirumuru N, St Gelais C, Koneru PC, Liu C, Kvaratskhelia M, et al. N(6)-  
594 Methyladenosine-binding proteins suppress HIV-1 infectivity and viral production. *J Biol*  
595 *Chem*. 2018;293(34):12992-3005. doi: 10.1074/jbc.RA118.004215. PubMed PMID:  
596 29976753; PubMed Central PMCID: PMC6109920.

- 597 33. Bader JP, Brown NR, Chiang PK, Cantoni GL. 3-Deazaadenosine, an inhibitor of  
598 adenosylhomocysteine hydrolase, inhibits reproduction of Rous sarcoma virus and  
599 transformation of chick embryo cells. *Virology*. 1978;89(2):494-505. doi: 10.1016/0042-  
600 6822(78)90191-5. PubMed PMID: 213879.
- 601 34. Doyle T, Goujon C, Malim MH. HIV-1 and interferons: who's interfering with whom? *Nat*  
602 *Rev Microbiol*. 2015;13(7):403-13. doi: 10.1038/nrmicro3449. PubMed PMID: 25915633.
- 603 35. Hardy GA, Sieg S, Rodriguez B, Anthony D, Asaad R, Jiang W, et al. Interferon- $\alpha$  is the  
604 primary plasma type-I IFN in HIV-1 infection and correlates with immune activation and  
605 disease markers. *PLoS One*. 2013;8(2):e56527. Epub 2013/02/20. doi:  
606 10.1371/journal.pone.0056527. PubMed PMID: 23437155; PubMed Central PMCID:  
607 PMCPMC3577907.
- 608 36. Jurczynszak D, Zhang W, Terry SN, Kehrer T, Bermudez Gonzalez MC, McGregor E, et al.  
609 HIV protease cleaves the antiviral m6A reader protein YTHDF3 in the viral particle. *PLoS*  
610 *Pathog*. 2020;16(2):e1008305. doi: 10.1371/journal.ppat.1008305. PubMed PMID:  
611 32053707; PubMed Central PMCID: PMCPMC7043784.
- 612 37. Rubio RM, Depledge DP, Bianco C, Thompson L, Mohr I. RNA m(6) A modification  
613 enzymes shape innate responses to DNA by regulating interferon beta. *Genes Dev*.  
614 2018;32(23-24):1472-84. doi: 10.1101/gad.319475.118. PubMed PMID: 30463905;  
615 PubMed Central PMCID: PMCPMC6295168.
- 616 38. Winkler R, Gillis E, Lasman L, Safra M, Geula S, Soyris C, et al. m(6)A modification  
617 controls the innate immune response to infection by targeting type I interferons. *Nat*  
618 *Immunol*. 2019;20(2):173-82. doi: 10.1038/s41590-018-0275-z. PubMed PMID: 30559377.
- 619 39. Lu M, Zhang Z, Xue M, Zhao BS, Harder O, Li A, et al. N(6)-methyladenosine  
620 modification enables viral RNA to escape recognition by RNA sensor RIG-I. *Nat Microbiol*.  
621 2020;5(4):584-98. doi: 10.1038/s41564-019-0653-9. PubMed PMID: 32015498; PubMed  
622 Central PMCID: PMCPMC7137398.
- 623 40. Durbin AF, Wang C, Marcotrigiano J, Gehrke L. RNAs Containing Modified Nucleotides  
624 Fail To Trigger RIG-I Conformational Changes for Innate Immune Signaling. *mBio*.  
625 2016;7(5). doi: 10.1128/mBio.00833-16. PubMed PMID: 27651356; PubMed Central  
626 PMCID: PMC5030355.

- 627 41. Courtney DG, Tsai K, Bogerd HP, Kennedy EM, Law BA, Emery A, et al.  
628 Epitranscriptomic Addition of m(5)C to HIV-1 Transcripts Regulates Viral Gene  
629 Expression. *Cell Host Microbe*. 2019;26(2):217-27 e6. doi: 10.1016/j.chom.2019.07.005.  
630 PubMed PMID: 31415754; PubMed Central PMCID: PMC6714563.
- 631 42. Martinelli E, Cicala C, Van Ryk D, Goode DJ, Macleod K, Arthos J, et al. HIV-1 gp120  
632 inhibits TLR9-mediated activation and IFN- $\alpha$  secretion in plasmacytoid dendritic  
633 cells. *Proc Natl Acad Sci U S A*. 2007;104(9):3396-401. doi: 10.1073/pnas.0611353104.  
634 PubMed PMID: 17360657; PubMed Central PMCID: PMC1805537.
- 635 43. Kaushik S, Teque F, Patel M, Fujimura SH, Schmidt B, Levy JA. Plasmacytoid dendritic  
636 cell number and responses to Toll-like receptor 7 and 9 agonists vary in HIV Type 1-  
637 infected individuals in relation to clinical state. *AIDS Res Hum Retroviruses*.  
638 2013;29(3):501-10. doi: 10.1089/AID.2012.0200. PubMed PMID: 23131038; PubMed  
639 Central PMCID: PMC3581027.
- 640 44. Solis M, Nakhaei P, Jalalirad M, Lacoste J, Douville R, Arguello M, et al. RIG-I-mediated  
641 antiviral signaling is inhibited in HIV-1 infection by a protease-mediated sequestration of  
642 RIG-I. *J Virol*. 2011;85(3):1224-36. doi: 10.1128/JVI.01635-10. PubMed PMID: 21084468;  
643 PubMed Central PMCID: PMC3020501.
- 644 45. Yan N, Regalado-Magdos AD, Stiggelbout B, Lee-Kirsch MA, Lieberman J. The cytosolic  
645 exonuclease TREX1 inhibits the innate immune response to human immunodeficiency virus  
646 type 1. *Nat Immunol*. 2010;11(11):1005-13. doi: 10.1038/ni.1941. PubMed PMID:  
647 20871604; PubMed Central PMCID: PMC2958248.
- 648 46. Sanchez DJ, Miranda D, Jr., Marsden MD, Dizon TM, Bontemps JR, Davila SJ, et al.  
649 Disruption of Type I Interferon Induction by HIV Infection of T Cells. *PLoS One*.  
650 2015;10(9):e0137951. doi: 10.1371/journal.pone.0137951. PubMed PMID: 26375588;  
651 PubMed Central PMCID: PMC4574156.
- 652 47. Sirois M, Robitaille L, Allary R, Shah M, Woelk CH, Estaquier J, et al. TRAF6 and IRF7  
653 control HIV replication in macrophages. *PLoS One*. 2011;6(11):e28125. doi:  
654 10.1371/journal.pone.0028125. PubMed PMID: 22140520; PubMed Central PMCID:  
655 PMC3225375.
- 656 48. Harman AN, Nasr N, Feetham A, Galoyan A, Alshehri AA, Rambukwelle D, et al. HIV  
657 Blocks Interferon Induction in Human Dendritic Cells and Macrophages by Dysregulation

- 658 of TBK1. *J Virol.* 2015;89(13):6575-84. doi: 10.1128/JVI.00889-15. PubMed PMID:  
659 25855743; PubMed Central PMCID: PMC4468486.
- 660 49. Okumura A, Alce T, Lubyova B, Ezelle H, Strebel K, Pitha PM. HIV-1 accessory proteins  
661 VPR and Vif modulate antiviral response by targeting IRF-3 for degradation. *Virology.*  
662 2008;373(1):85-97. doi: 10.1016/j.virol.2007.10.042. PubMed PMID: 18082865; PubMed  
663 Central PMCID: PMC2312338.
- 664 50. Sachdeva N, Asthana V, Brewer TH, Garcia D, Asthana D. Impaired restoration of  
665 plasmacytoid dendritic cells in HIV-1-infected patients with poor CD4 T cell reconstitution  
666 is associated with decrease in capacity to produce IFN-alpha but not proinflammatory  
667 cytokines. *J Immunol.* 2008;181(4):2887-97. doi: 10.4049/jimmunol.181.4.2887. PubMed  
668 PMID: 18684980.
- 669 51. Doehle BP, Chang K, Rustagi A, McNevin J, McElrath MJ, Gale M, Jr. Vpu mediates  
670 depletion of interferon regulatory factor 3 during HIV infection by a lysosome-dependent  
671 mechanism. *J Virol.* 2012;86(16):8367-74. doi: 10.1128/JVI.00423-12. PubMed PMID:  
672 22593165; PubMed Central PMCID: PMC3421752.
- 673 52. Antonucci JM, St Gelais C, de Silva S, Yount JS, Tang C, Ji X, et al. SAMHD1-mediated  
674 HIV-1 restriction in cells does not involve ribonuclease activity. *Nat Med.*  
675 2016;22(10):1072-4. doi: 10.1038/nm.4163. PubMed PMID: 27711056; PubMed Central  
676 PMCID: PMCPMC5069697.
- 677 53. Chen S, Bonifati S, Qin Z, St Gelais C, Kodigepalli KM, Barrett BS, et al. SAMHD1  
678 suppresses innate immune responses to viral infections and inflammatory stimuli by  
679 inhibiting the NF-kappaB and interferon pathways. *Proc Natl Acad Sci U S A.*  
680 2018;115(16):E3798-E807. doi: 10.1073/pnas.1801213115. PubMed PMID: 29610295;  
681 PubMed Central PMCID: PMCPMC5910870.
- 682 54. Wei J, Liu F, Lu Z, Fei Q, Ai Y, He PC, et al. Differential m(6)A, m(6)Am, and m(1)A  
683 Demethylation Mediated by FTO in the Cell Nucleus and Cytoplasm. *Mol Cell.*  
684 2018;71(6):973-85 e5. doi: 10.1016/j.molcel.2018.08.011. PubMed PMID: 30197295;  
685 PubMed Central PMCID: PMCPMC6151148.
- 686 55. Vazquez C, Tan CY, Horner SM. Hepatitis C Virus Infection Is Inhibited by a Noncanonical  
687 Antiviral Signaling Pathway Targeted by NS3-NS4A. *J Virol.* 2019;93(23). doi:

688 10.1128/JVI.00725-19. PubMed PMID: 31534039; PubMed Central PMCID:  
689 PMCPMC6854490.  
690 56. Mali P, Yang L, Esvelt KM, Aach J, Guell M, DiCarlo JE, et al. RNA-guided human  
691 genome engineering via Cas9. *Science*. 2013;339(6121):823-6. doi:  
692 10.1126/science.1232033. PubMed PMID: 23287722; PubMed Central PMCID:  
693 PMCPMC3712628.

694

695 **Figure legends** (8 main figures and 2 supplemental figures)

696

697 **Fig. 1. A single m<sup>6</sup>A modification of HIV-1 RNA oligos inhibits IFN-I induction in**  
698 **differentiated U937 cells. (A)** HIV-1 5' UTR (nt. 235–281) RNA oligo 1 (50 ng) with (m<sup>6</sup>A) or  
699 without (control, Ctrl) m<sup>6</sup>A modification were subjected to m<sup>6</sup>A dot-blot analysis. MB,  
700 methylene blue staining (an RNA loading control). **(B)** and **(C)** RNA oligo 1 (250 ng) were  
701 transfected into PMA-differentiated U937 cells. After 16 h, *IFN-α* and *IFN-β* mRNA levels were  
702 measured by RT-qPCR. Data shown are means ± S.D. of three independent experiments. Mann-  
703 Whitney t-test was used for statistical analysis. **(D)** HIV-1 5' UTR (nt. 176–217) RNA oligo 2  
704 (200 ng) with (m<sup>6</sup>A) or without (Ctrl) m<sup>6</sup>A modification were subjected to m<sup>6</sup>A dot-blot analysis.  
705 **(E)** and **(F)** RNA oligo 2 (250 ng) were transfected into PMA-differentiated U937 cells. After 16  
706 h, *IFN-α* and *IFN-β* mRNA levels were measured by RT-qPCR. Data shown are means ± S.D. of  
707 three independent experiments. Un-paired t-test was used for statistical analysis. \*\* *P* < 0.005,  
708 compared with Ctrl samples.

709

710 **Fig. 2. Inhibition of m<sup>6</sup>A modifications of HIV-1 RNA by FTO increases IFN-I induction.**

711 **(A)** m<sup>6</sup>A levels of HIV-1 genomic RNA were reduced by treatment with demethylase FTO and  
712 50 ng of RNAs were used to confirm the m<sup>6</sup>A levels by the dot-blot assay. **(B)** and **(C)** 250 ng of

713 the above RNAs were transfected in PMA-differentiated U937 cells. After 16 h, *IFN- $\alpha$*  and *IFN-*  
714  *$\beta$*  mRNA levels were measured by RT-qPCR. The results are shown as means  $\pm$  S.D. of three  
715 independent experiments. Mann-Whitney t-test was used for statistical analysis. \*\*\*  $P < 0.0005$ ,  
716 compared with control samples. **(D)** HEK293T cells were transfected with vector control (Vec)  
717 or an FTO-expressing plasmid (FTO). After 24 h, HIV-1 proviral DNA clone (pNL4-3) was  
718 transfected for 48 h. Then, cell lysates were collected, and Western blotting was performed using  
719 indicated antibodies. **(E)** the m<sup>6</sup>A levels in HIV-1 genomic RNA were determined by the dot-  
720 blot assay using 100 ng purified viral RNA derived from Vec or FTO-expressing HEK293T  
721 cells. **(F)** and **(G)** PMA-differentiated U937 cells were transfected with 500 ng of HIV-1 RNA or  
722 250 ng of poly(I:C) for 16 h and analyzed for *IFN- $\alpha$*  and *IFN- $\beta$*  mRNA levels by RT-qPCR. The  
723 results are shown as means  $\pm$  S.D. of three independent assays. Un-paired t-test was used for  
724 statistical analysis. \*  $P < 0.05$ , \*\*  $P < 0.005$ , compared between FTO and Vec samples. **(H)** and  
725 **(I)** PMA-differentiated U937 cells were infected by HIV-1 (250 pg of p24) from Vec or FTO-  
726 expressing HEK293T cells for 16 h, and *IFN- $\alpha$*  and *IFN- $\beta$*  mRNA levels were quantified by RT-  
727 qPCR. The results are shown as means  $\pm$  S.D. of three independent assays. Un-paired t-test was  
728 used for statistical analysis. \*  $P < 0.05$ , \*\*  $P < 0.005$ , Vec samples were normalized with non-  
729 infection samples.

730

731 **Fig. 3. Inhibition of m<sup>6</sup>A modifications of HIV-1 RNA by ALKBH5 increases IFN-I**  
732 **induction.** **(A)** HEK293T cells were transfected with a vector control (Vec) or an ALKBH5-  
733 expressing plasmid (ALKBH5). After 24 h, pNL4-3 was transfected into these cells for 48 h.  
734 Western blotting of cell lysates was performed using specific antibodies. **(B)** HIV-1 genomic  
735 RNA m<sup>6</sup>A levels were determined by the dot-blot assay using 100 ng viral RNA from Vec or

736 ALKBH5-expressing HEK293T cells. (C) and (D) PMA-differentiated U937 cells were  
737 transfected with 500 ng of the indicated HIV-1 RNAs. At 16 h post-transfection, cells were  
738 collected for the analysis of *IFN- $\alpha$*  and *IFN- $\beta$*  mRNA levels by RT-qPCR. The results are shown  
739 as means  $\pm$  S.D. of three repeated assays. \*  $P < 0.05$ , \*\*\*\*  $P < 0.0001$ . (E) and (F) PMA-  
740 differentiated U937 cells were infected with HIV-1 (250 pg of p24) from Vec or ALKBH5-  
741 expressing HEK293T cells for 16 h, and *IFN- $\alpha$*  and *IFN- $\beta$*  mRNA levels were quantified by RT-  
742 qPCR. The results are shown as means  $\pm$  S.D. of three repeated experiments. Vec samples were  
743 normalized with non-infection samples. Un-paired t-test was used for statistical analysis. \*\*\*  $P <$   
744 0.0005, \*\*\*\*  $P < 0.0001$ . Vec samples were normalized with non-infection samples. Un-paired t-  
745 test was used for statistical analysis.

746

747 **Fig. 4. Knockout of erasers increases m<sup>6</sup>A levels in HIV-1 RNA and reduces IFN-I**  
748 **induction. (A)** A single clone-derived control, FTO or ALKBH5 knockout (KO) HEK293T cells  
749 were transfected with pNL4-3 HIV proviral DNA. After 48 h, cells were collected for Western  
750 blotting analysis. (B) HIV-1 from the KO cells were collected and viral genomic RNA m<sup>6</sup>A level  
751 was determined by the dot-blot assay using 200 ng viral RNA. (C) and (D) HIV-1 RNA (250 ng)  
752 from KO cells were transfected into PMA-differentiated U937 cells. After 16 h, cells were  
753 collected for the analysis of *IFN- $\alpha$*  and *IFN- $\beta$*  mRNA levels by RT-qPCR. The results are shown  
754 as means  $\pm$  S.D. of three repeats with similar result. \*  $P < 0.05$ , \*\*\*  $P < 0.0005$ . Un-paired t-test  
755 was used for statistical analysis. (E) and (F) HIV-1 (250 pg of p24) from KO cells were used to  
756 infect PMA-differentiated U937 cells for 16 h, and cells were collected for the analysis of *IFN- $\alpha$*   
757 and *IFN- $\beta$*  mRNA levels by RT-qPCR. The results are shown as means  $\pm$  S.D. of three repeats  
758 with similar result. \*\*  $P < 0.005$ . Un-paired t-test was used for statistical analysis.

759

760 **Fig. 5. DAA-treatment reduces m<sup>6</sup>A modifications of HIV-1 RNA and increases IFN-I**  
761 **induction through IRF3 and IRF7 phosphorylation.** HEK293T cells were treated with  
762 solvent (Ctrl, PBS) or DAA (50  $\mu$ M) for 3 h and then transfected with the HIV-1 proviral DNA  
763 pNL4-3. HIV-1 in the supernatants was collected after 48 h. **(A)** HIV-1 p24 levels in the  
764 supernatants were measured by ELISA. **(B)** RNA (100 ng) from these viruses used for the m<sup>6</sup>A  
765 dot-blot assay. **(C)** and **(D)** HIV-1 RNA (250 ng) from Ctrl and DAA-treated samples were  
766 transfected into PMA-differentiated U937 cells. After 16 h, cells were collected for the analysis  
767 of *IFN- $\alpha$*  and *IFN- $\beta$*  mRNA levels by RT-qPCR. The results are shown as means  $\pm$  S.D. of three  
768 independent experiments. \*\*\*  $P < 0.0005$ , \*\*\*\*  $P < 0.0001$ . Un-paired t-test was used for  
769 statistical analysis. **(E)** and **(F)** HIV-1 (250 pg of p24) from HEK293T cells was used to infect  
770 PMA-differentiated U937 cells for 16 h. After 16 h, U937 cells were collected for the analysis of  
771 *IFN-I* mRNA levels by RT-qPCR. The results are shown as means  $\pm$  S.D. of three independent  
772 experiments. \*\*\*  $P < 0.0005$ , \*\*\*\*  $P < 0.0001$ , Ctrl samples were normalized with non-infection  
773 samples. Un-paired t-test was used for statistical analysis. **(G)** PMA-differentiated U937 cells  
774 were infected with HIV-1 (250 pg of p24) derived from DAA-treated or control HEK293T cells  
775 for 4 h, and U937 cell lysates (50  $\mu$ g proteins/sample) were used for the analysis of the indicated  
776 proteins by Western blotting. GAPDH is used as a loading control. The p-IRF3 and p-IRF7  
777 indicate phosphorylated IRF3 and IRF7, respectively.

778

779 **Fig. 6. RIG-I senses m<sup>6</sup>A modification of HIV-1 RNA to induce IFN-I expression.** **(A)** RIG-I  
780 expression levels in control (Con) and RIG-I knockout (sgRIG-I) U937 cells were measured by  
781 Western blotting. **(B)** Con and RIG-I KO U937 cells were transfected with 250 ng of poly(I:C).



782 At 16 h post-transfection, cells were collected for the analysis of *IFN- $\alpha$*  and *IFN- $\beta$*  mRNA levels  
783 by RT-qPCR. The results are shown as means  $\pm$  S.D. of three repeats with similar result. \*\*  $P <$   
784 0.005, \*\*\*\*  $P <$  0.0001. (C) and (D) PMA-differentiated Con and RIG-I KO U937 cells were  
785 transfected with 250 ng of RNA oligo 1 (C) or oligo 2 (D). After 16 h, cells were collected for  
786 the analysis of *IFN- $\alpha$*  and *IFN- $\beta$*  mRNA levels by RT-qPCR. The results are shown as means  $\pm$   
787 S.D. of three repeated experiments. \*  $P <$  0.05, \*\*  $P <$  0.005, \*\*\*\*  $P <$  0.0001. Un-paired t-test  
788 was used for statistical analysis. ns, not significant.

789

790 **Fig. 7. MDA5 has no specific role in m<sup>6</sup>A modification of HIV-1 RNA to induce IFN-I**  
791 **expression.** (A) MDA5 expression levels were measured by Western blotting using control  
792 (shCon) and stable MDA5 knockdown (shMDA5) U937 cells. (B) shCon and shMDA5 U937  
793 cells were transfected with poly(I:C). At 16 h post-transfection, cells were collected for the  
794 analysis of *IFN- $\alpha$*  and *IFN- $\beta$*  mRNA levels by RT-qPCR. The results are shown as means  $\pm$  S.D.  
795 of three repeats with similar result. \*  $P <$  0.05, \*\*  $P <$  0.005. (C) and (D) PMA-differentiated  
796 shCon and shMDA5 U937 cells were transfected with 250 ng of RNA oligo 1 (C) or oligo 2 (D).  
797 At 16 h post-transfection, cells were collected for the analysis of *IFN- $\alpha$*  and *IFN- $\beta$*  mRNA levels  
798 by RT-qPCR. The results are shown as means  $\pm$  S.D. of three repeated experiments.

799

800 **Fig. 8. Increased m<sup>6</sup>A levels in total RNA of PBMCs from HIV-1 viremic patients.** (A) Total  
801 cellular RNA was isolated from the PBMCs of uninfected healthy individuals (control), HIV-1  
802 infected individuals without ART (viremic), and HIV-1 infected individuals on ART (ART)  
803 were subjected to m<sup>6</sup>A dot-blot analysis (200 ng RNA). The dots were quantified and normalized  
804 to the respective methylene blue control. The m<sup>6</sup>A level of first control sample (C1) was set as 1.

805 Each symbol within the column represents each individual's data point. **(B)** and **(C)** The isolated  
806 RNA from the PBMCs of the above described three groups of patients were subjected to RT-  
807 qPCR for measuring *IFN- $\alpha$*  and *IFN- $\beta$*  mRNA expression. The values were normalized to their  
808 respective internal control (*GAPDH*). Each symbol represents the data from each individual. **(D)**  
809 Cell lysates of PBMCs of each group were subjected to Western blotting for m<sup>6</sup>A writers  
810 (METTL3 and METTL14) and erasers (ALKBH5 and FTO). The bands were quantified using  
811 Image J software and normalized to GAPDH control before plotting into this graphical  
812 representation. n, the number of healthy donors or patients. Five samples (C6-C9 and V6) were  
813 not included in the Western blot analysis due to the lack of sufficient cell lysates. \*  $P < 0.05$ , \*\*  
814  $P < 0.005$ . The one-way analysis of variance (ANOVA) nonparametric was used for statistical  
815 analysis.

816 **Supplemental Fig. S1-S2 legends**

817

818 **Fig. S1. Detection of RNA m<sup>6</sup>A modification and writer and eraser proteins in PBMCs**

819 **from healthy donors and HIV-1 patients. (A)** Total cellular RNA was isolated from the

820 PBMCs of three groups; uninfected healthy control individuals (C1-C9), HIV-1 infected

821 individuals without ART (V1-V6) and with ART (A1-A16) were subjected to m<sup>6</sup>A dot-blot

822 analysis (200 ng RNA/sample). Methylene blue (MB) staining serves as a loading control. Here

823 every blot represents one patient with the code as referred in Supplemental Table 1. **(B)** Cell

824 lysates of PBMCs of each group uninfected healthy individuals (C1-C5), HIV-1 infected

825 individuals without ART (V1-V5) and with ART (A1-A16) were subjected to Western blot

826 analysis. Five samples (C6-C9 and V6) were not included in the Western blot analysis due to the

827 lack of sufficient cell lysates. Equal amount of proteins (10 µg) of whole cell lysate was

828 immunoblotted for m<sup>6</sup>A writers (METTL3 and METTL14) and erasers (ALKBH5 and FTO)

829 using specific antibodies. GAPDH serves as a loading control. For the densitometry quantitation

830 of METTL3 levels, only one band at an approximate molecular weight of 70 kDa was used.

831

832 **Fig. S2. HIV-1 RNA escapes from innate immune surveillance.** In HIV-1 producer cells,

833 writers add and erasers remove internal m<sup>6</sup>A modifications (blue dots) of viral RNA,

834 respectively. HIV-1 with m<sup>6</sup>A-modified RNA avoids innate sensing in infected myeloid cells,

835 thereby escaping immune surveillance. Overexpression (O/E) of erasers or inhibiting m<sup>6</sup>A

836 addition with DAA in HIV-1 producer cells generates viruses with m<sup>6</sup>A-defective viral RNA.

837 When HIV-1 with m<sup>6</sup>A-defective RNA infects macrophage-like cells, the cytoplasmic RNA

838 sensor RIG-I recognizes unmodified HIV-1 RNA and triggers phosphorylation (indicated by the

839 letter P) of the transcription factors IRF3 and IRF7. Phosphorylation of IRF3/7 leads to IFN- $\alpha/\beta$   
840 expression and generates antiviral innate immune responses in HIV-1-infected macrophage-like  
841 cells. However, it remains to be established whether m<sup>6</sup>A-defective HIV-1 RNA enhances  
842 binding to RIG-I, thereby inducing IRF3/7 activation and IFN-I expression in cells.

843 **Supplemental Table 1. Details of PBMC samples from healthy control donors (C1-C9),**  
 844 **HIV-1 viremic patients (V1-V6), and HIV-1 patients on ART (A1-A16)**

845

| Sample code | Donor gender | Infection status | HIV-1 viral load (copies/mL) | Therapy regimen                        |
|-------------|--------------|------------------|------------------------------|----------------------------------------|
| C1          | Male (M)     | Uninfected       | 0                            | No therapy                             |
| C2          | M            | Uninfected       | 0                            | No therapy                             |
| C3          | M            | Uninfected       | 0                            | No therapy                             |
| C4          | M            | Uninfected       | 0                            | No therapy                             |
| C5          | M            | Uninfected       | 0                            | No therapy                             |
| C6          | M            | Uninfected       | 0                            | No therapy                             |
| C7          | M            | Uninfected       | 0                            | No therapy                             |
| C8          | M            | Uninfected       | 0                            | No therapy                             |
| C9          | M            | Uninfected       | 0                            | No therapy                             |
| V1          | M            | HIV+Viremic      | 120,000                      | Pre-therapy                            |
| V2          | M            | HIV+Viremic      | 34,000                       | Pre-therapy                            |
| V3          | M            | HIV+Viremic      | 1,318,000                    | Pre-therapy                            |
| V4          | M            | HIV+Viremic      | 35,000                       | Pre-therapy                            |
| V5          | M            | HIV+Viremic      | 16,000                       | Pre-therapy                            |
| V6          | M            | HIV+Viremic      | 22,909                       | Pre-therapy                            |
| A1          | M            | HIV+Suppressed   | ND (non-detectable)          | Abacavir, Lamivudine, Efavirenz        |
| A2          | M            | HIV+Suppressed   | ND                           | Tenofovir, emtricitabine, dolutegravir |
| A3          | M            | HIV+Suppressed   | ND                           | Abacavir, Lamivudine, dolutegravir     |
| A4          | M            | HIV+Suppressed   | ND                           | Tenofovir, emtricitabine, dolutegravir |
| A5          | M            | HIV+Suppressed   | ND                           | Abacavir, Lamivudine, dolutegravir     |

|     |   |                |    |                                                          |
|-----|---|----------------|----|----------------------------------------------------------|
| A6  | M | HIV+Suppressed | ND | Tenofovir,<br>emtricitabine, Efavirenz                   |
| A7  | M | HIV+Suppressed | ND | Tenofovir,<br>emtricitabine,<br>dolutegravir             |
| A8  | M | HIV+Suppressed | ND | Tenofovir,<br>emtricitabine,<br>dolutegravir             |
| A9  | M | HIV+Suppressed | ND | Tenofovir,<br>emtricitabine, Efavirenz                   |
| A10 | M | HIV+Suppressed | ND | Abacavir, Lamivudine,<br>dolutegravir                    |
| A11 | M | HIV+Suppressed | ND | Abacavir, Lamivudine,<br>dolutegravir                    |
| A12 | M | HIV+Suppressed | ND | Abacavir, Lamivudine,<br>Efavirenz                       |
| A13 | M | HIV+Suppressed | ND | Tenofovir,<br>emtricitabine,<br>elvitegravir, cobicistat |
| A14 | M | HIV+Suppressed | ND | Abacavir, Lamivudine,<br>dolutegravir                    |
| A15 | M | HIV+Suppressed | ND | Abacavir, Lamivudine,<br>dolutegravir                    |
| A16 | M | HIV+Suppressed | ND | Abacavir, Lamivudine,<br>dolutegravir                    |

846

**Fig. 1**

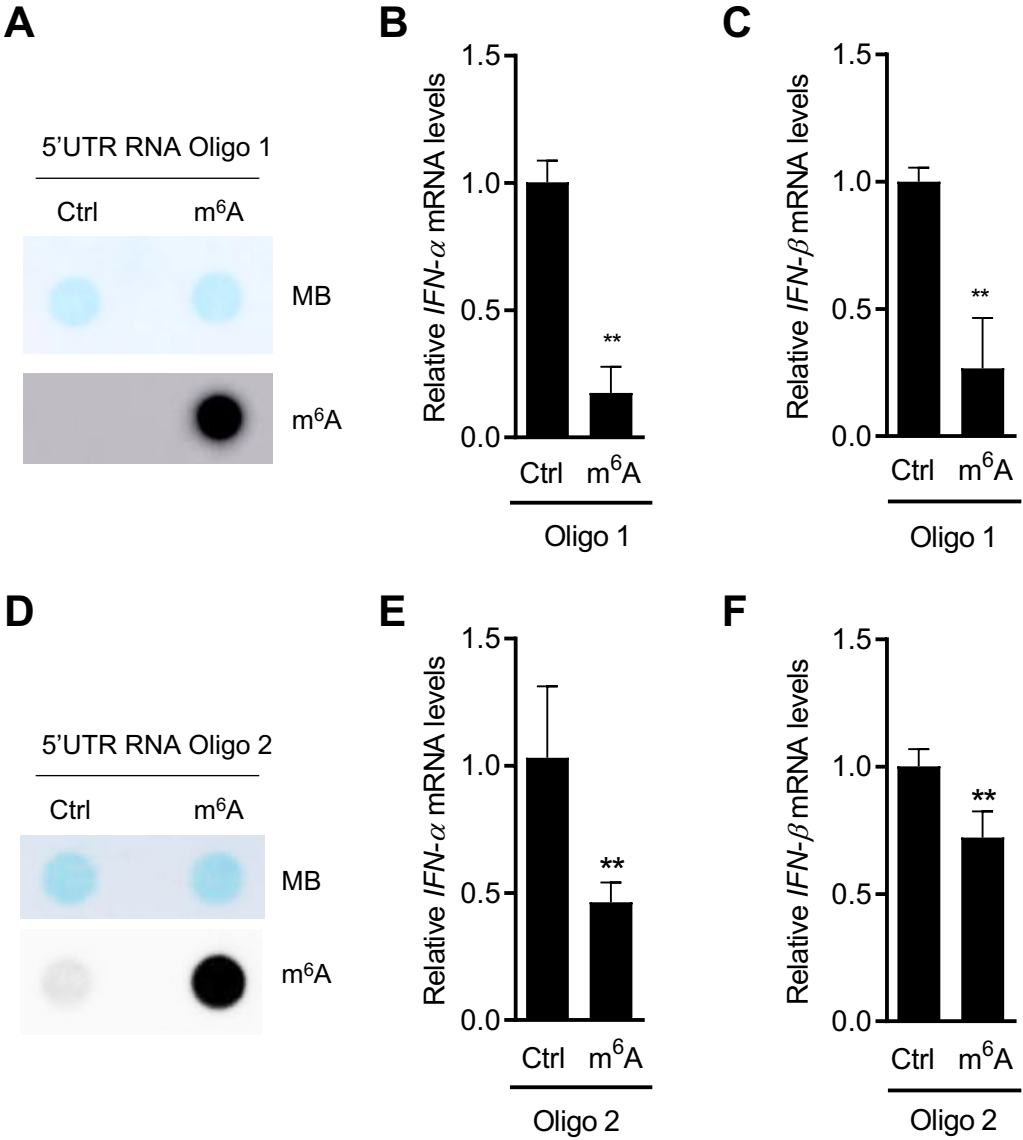

**Fig. 2**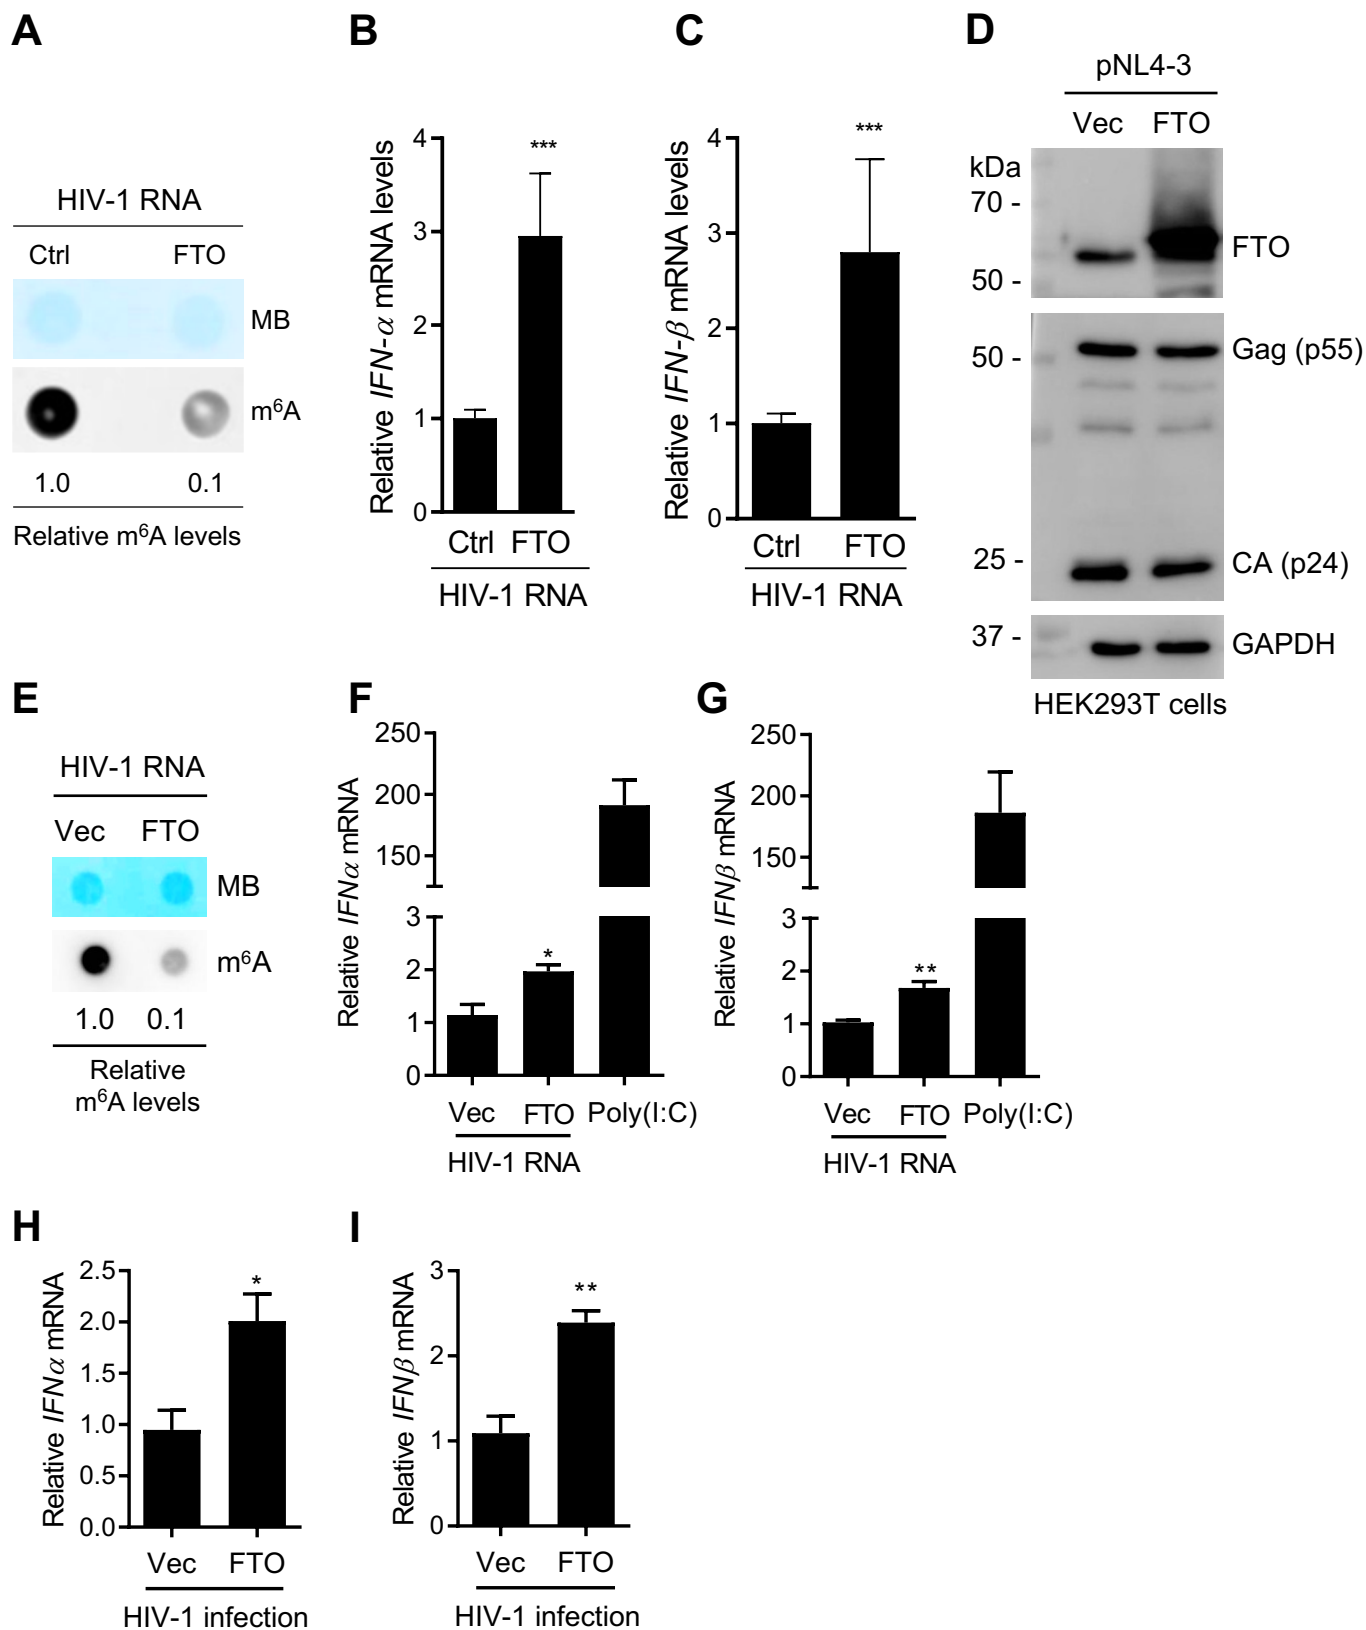



**Fig. 3**

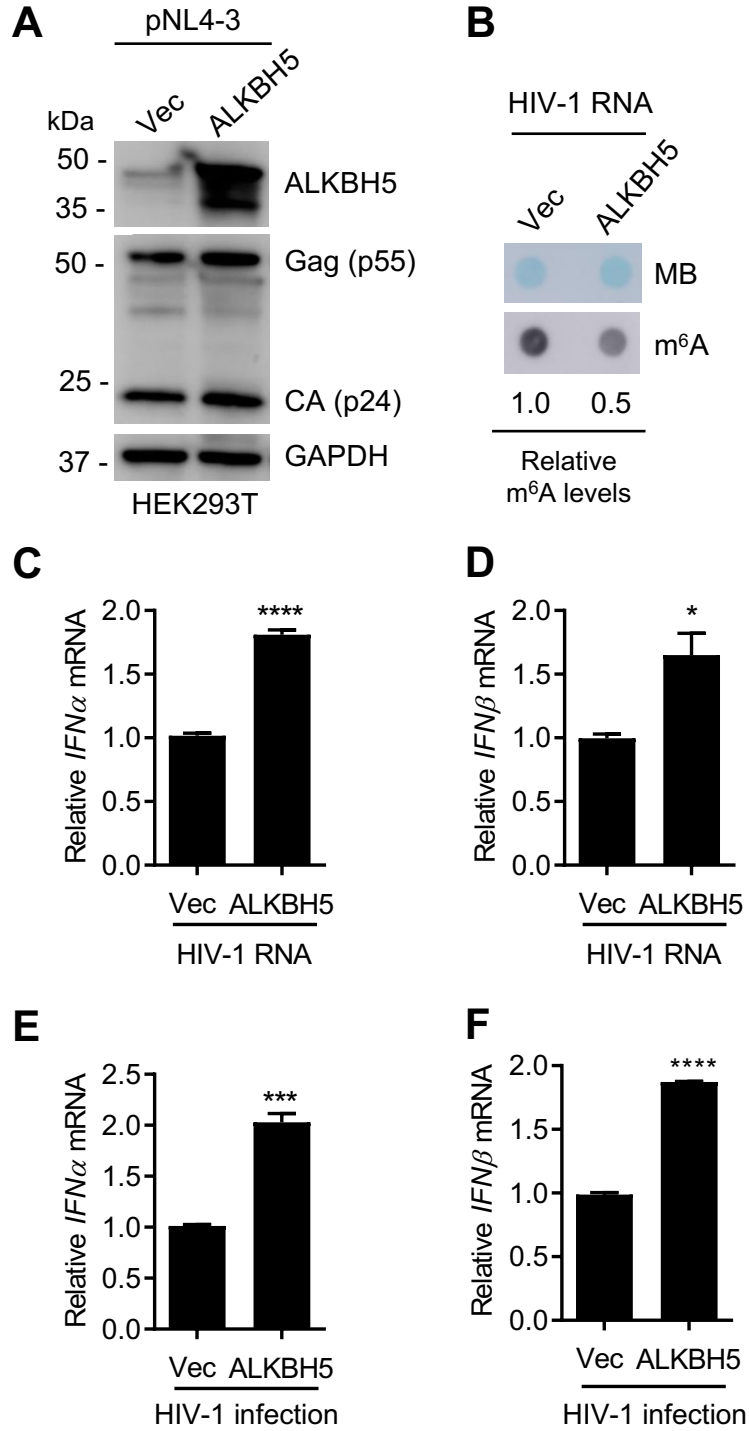

**Fig. 4**

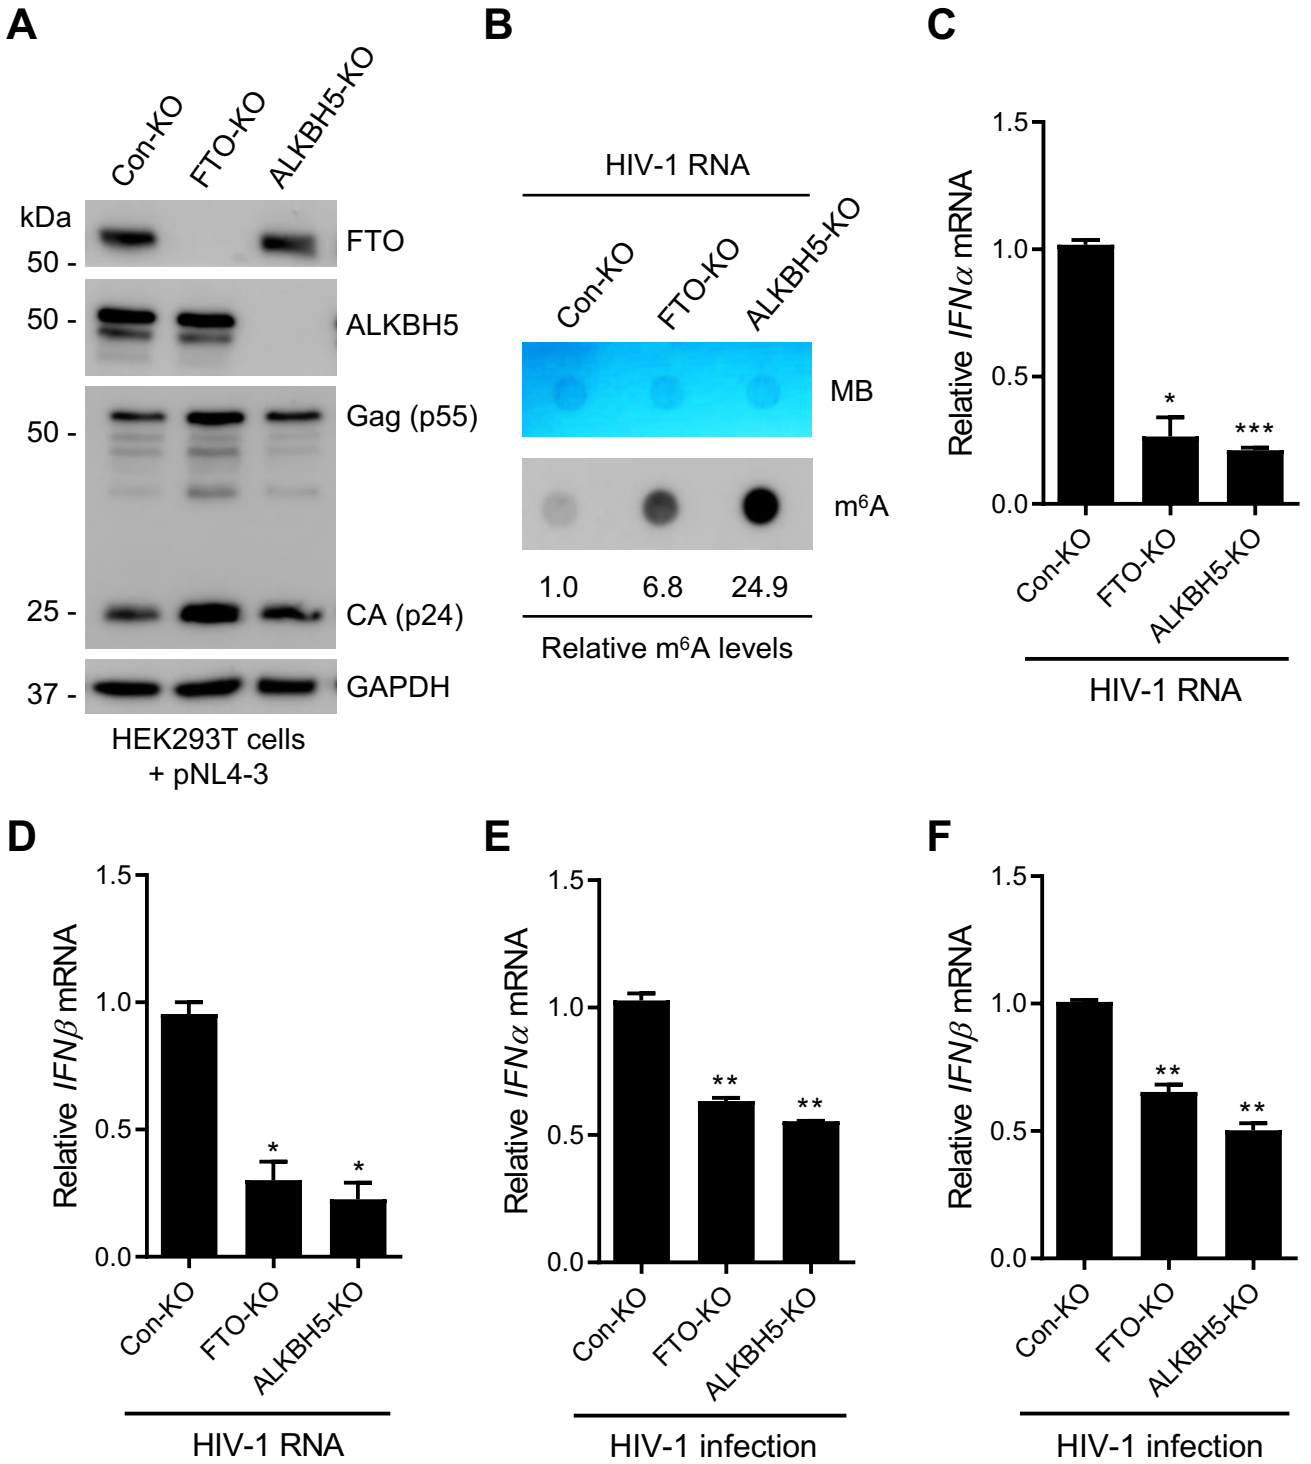

**Fig. 5**

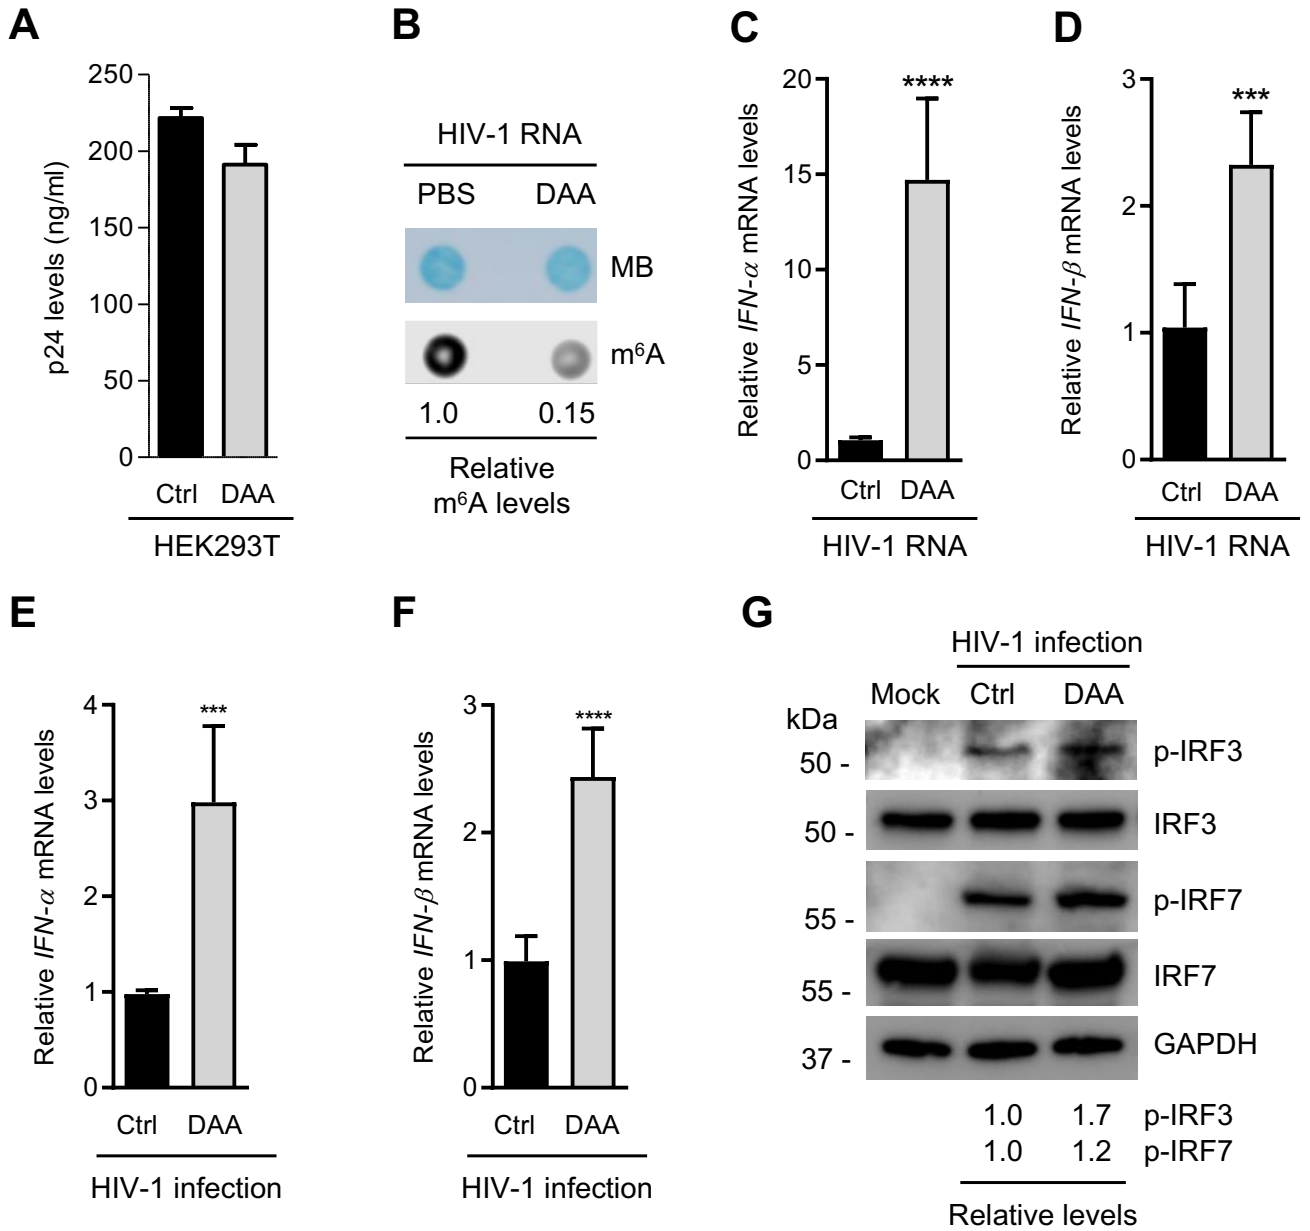

**Fig. 6**

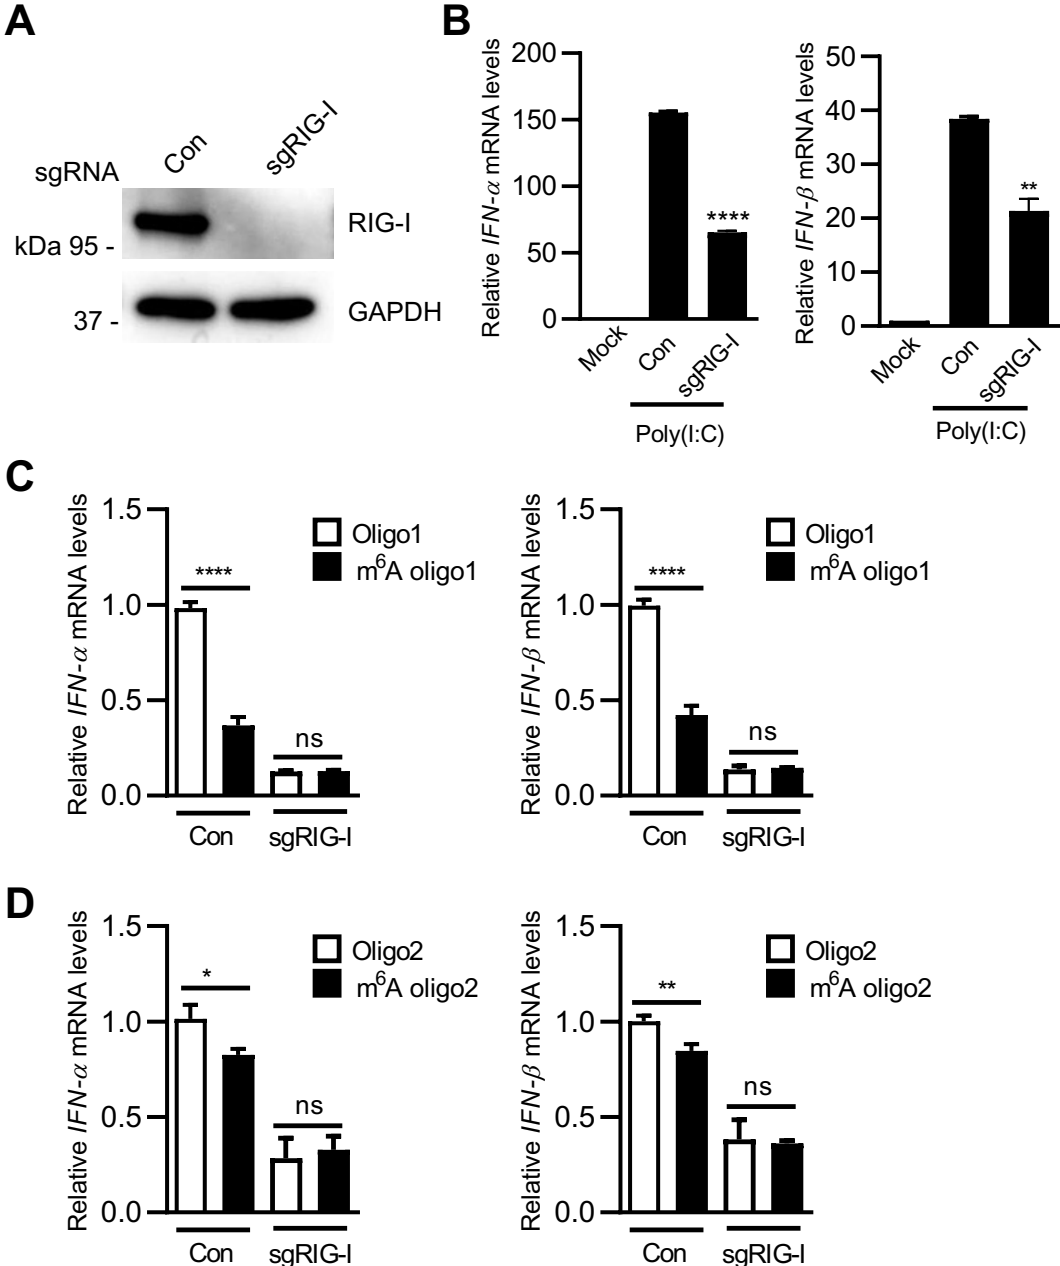

**Fig. 7**

**A**

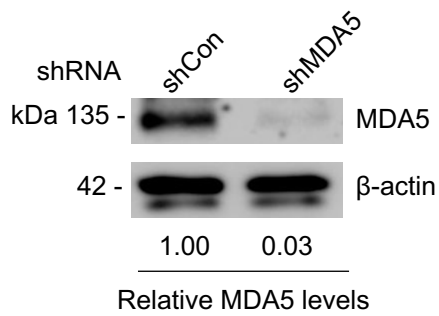

**B**

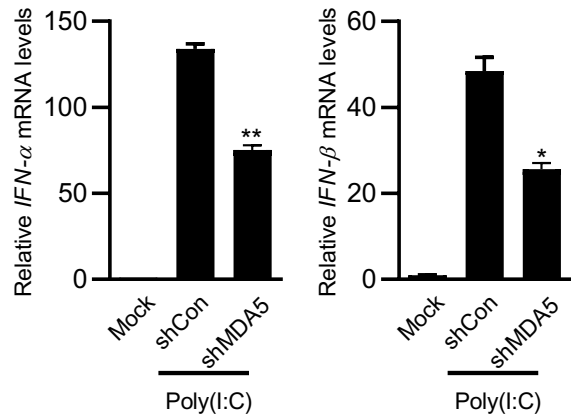

**C**

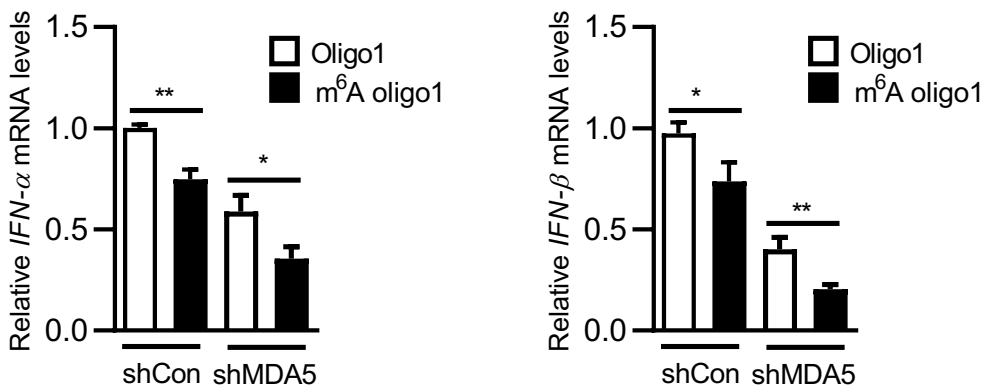

**D**

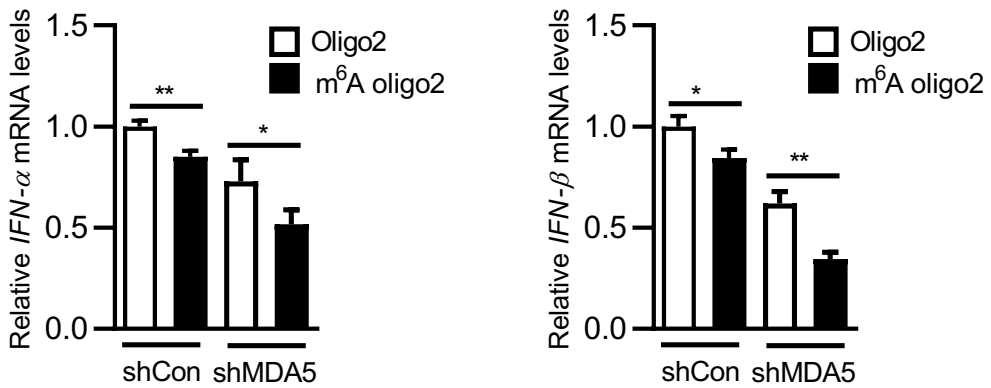

Fig. 8

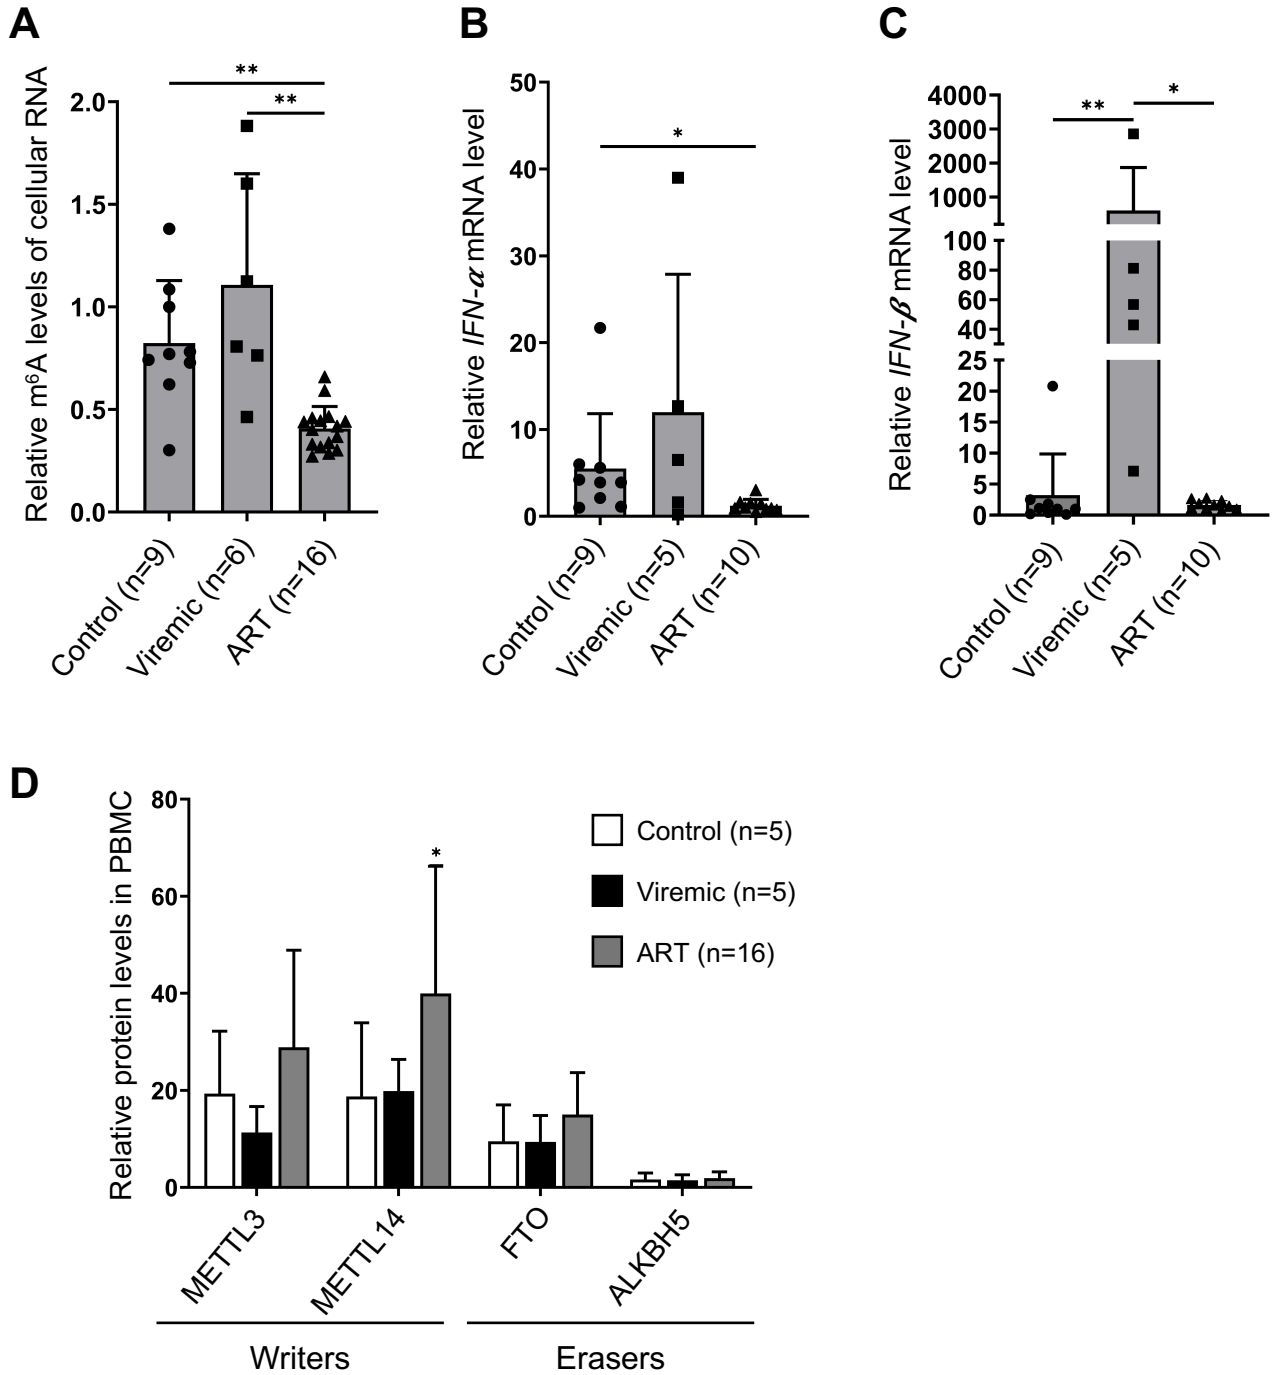

Supplemental Fig. S1

**A**

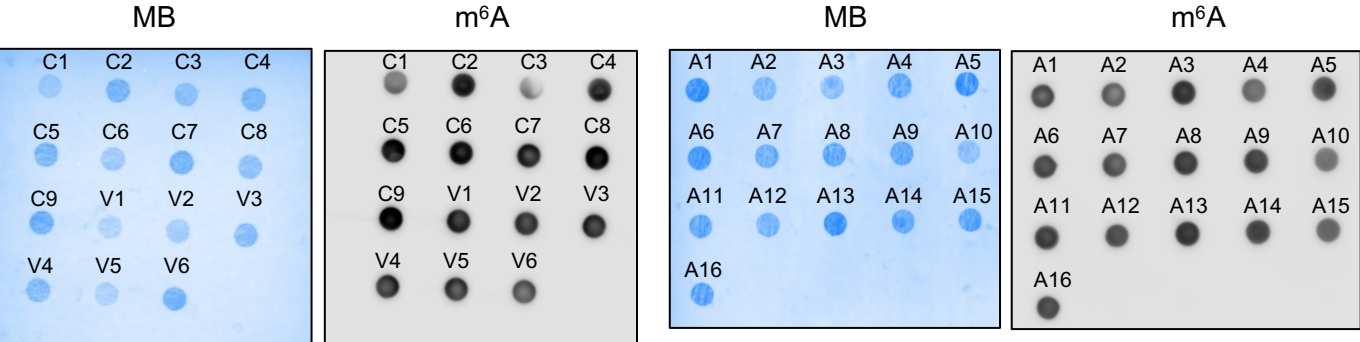

**B**

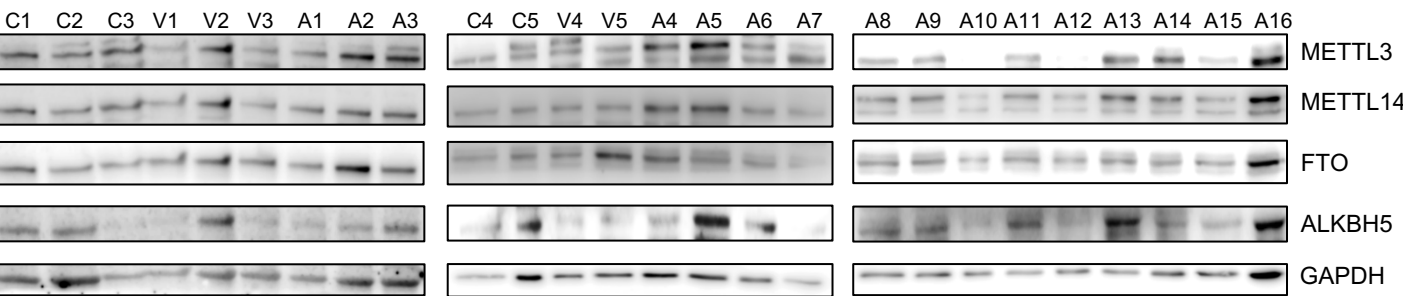

Supplemental Fig. S2

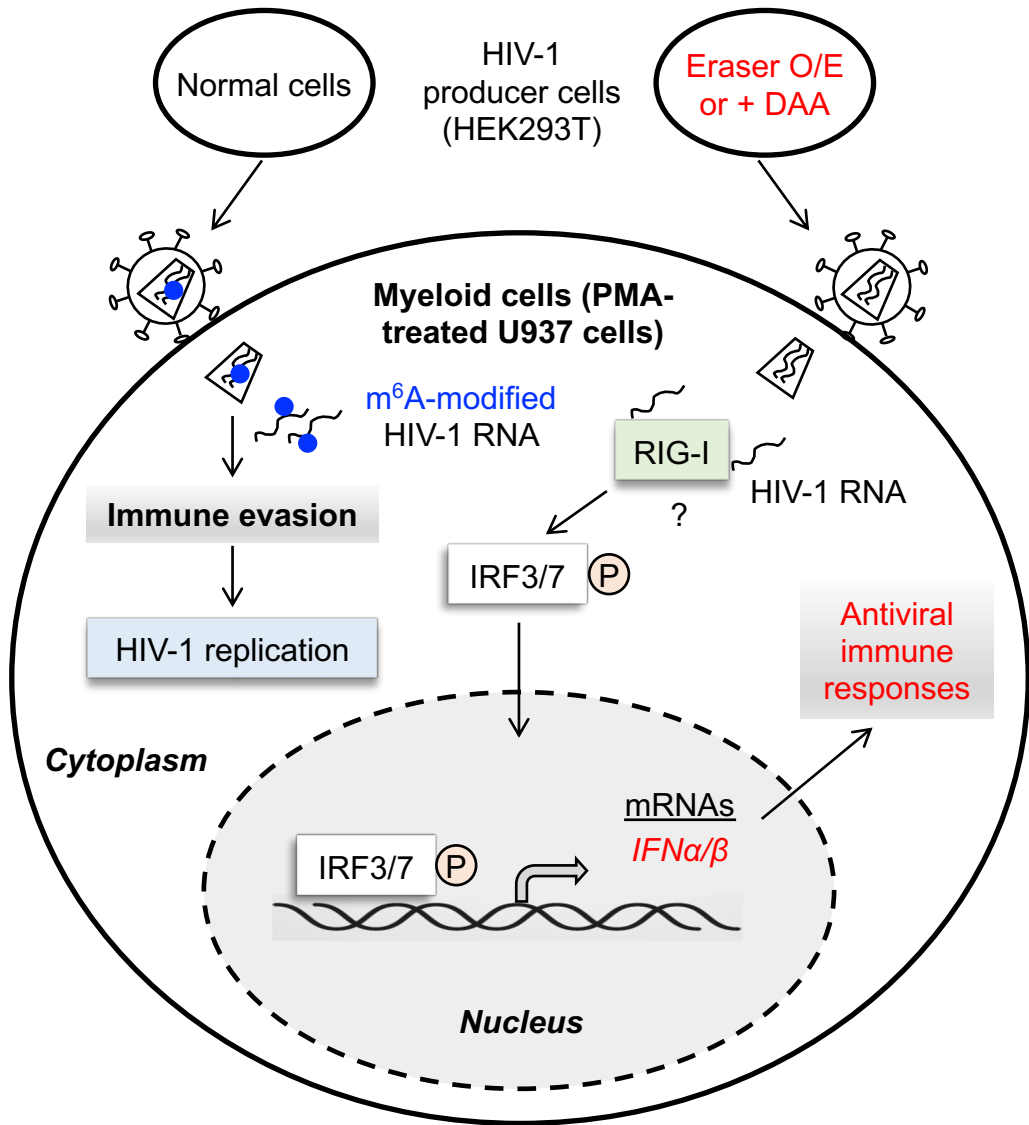

Source: https://www.biorxiv.org/content/10.1101/2020.11.04.368712v1.full.pdf
